# Supplementary material for: Cocoa Shell Extract Reduces Blood Pressure in Aged Hypertensive Rats via the Cardiovascular Upregulation of Endothelial Nitric Oxide Synthase and Nuclear Factor (Erythroid-Derived 2)-like 2 Protein Expression
Source: MDPI journal article supplement (doi:10.3390/antiox12091698), 2023-08-31

## Supplementary immunoblot data

**Figure S1:** Protein expression gels using Western blotting experiments

Heart. Nrf2 total

Gel 1

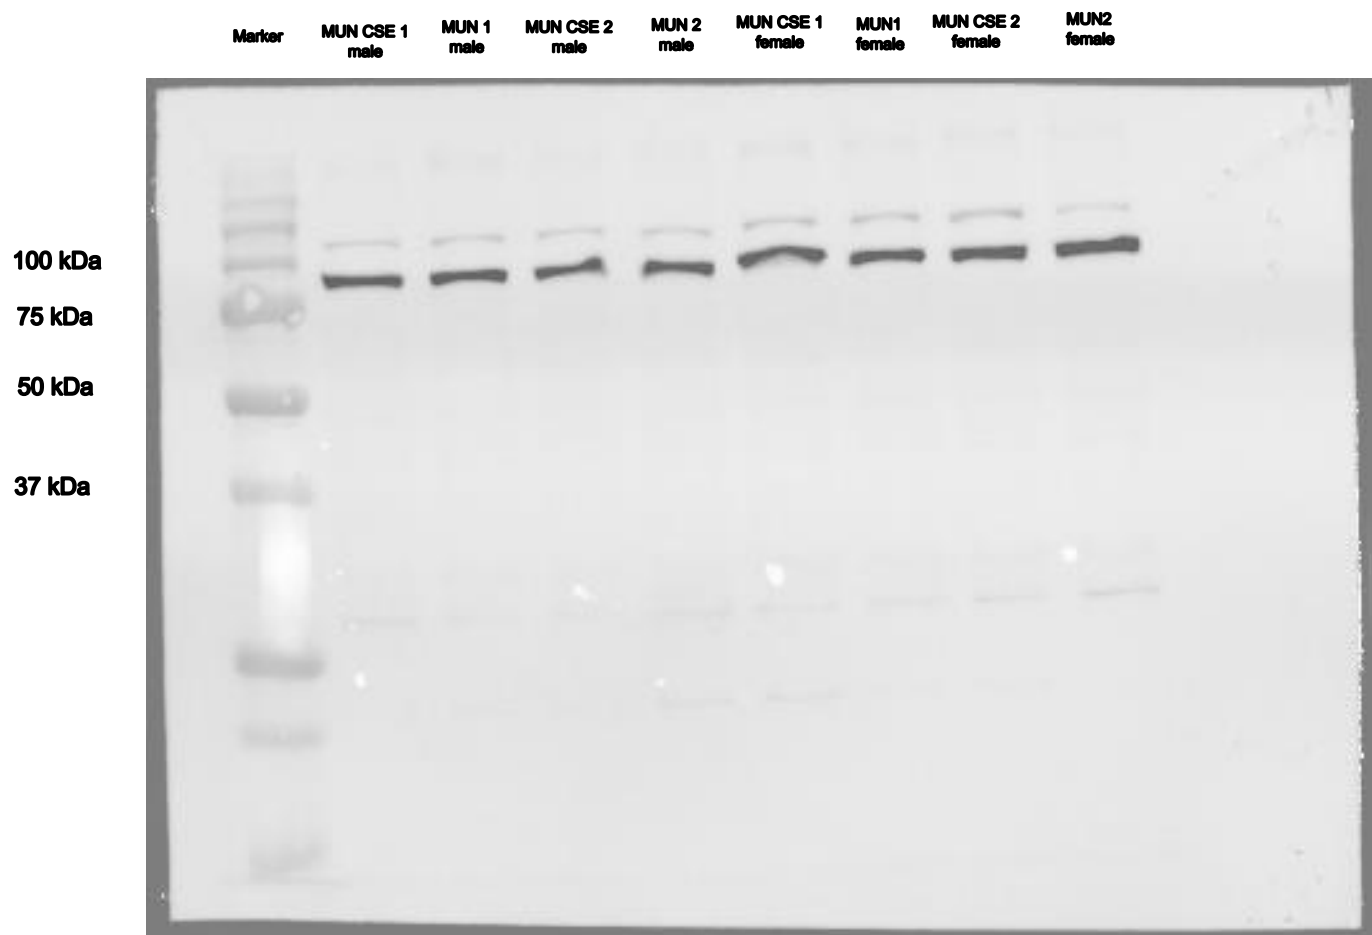

Gel 2

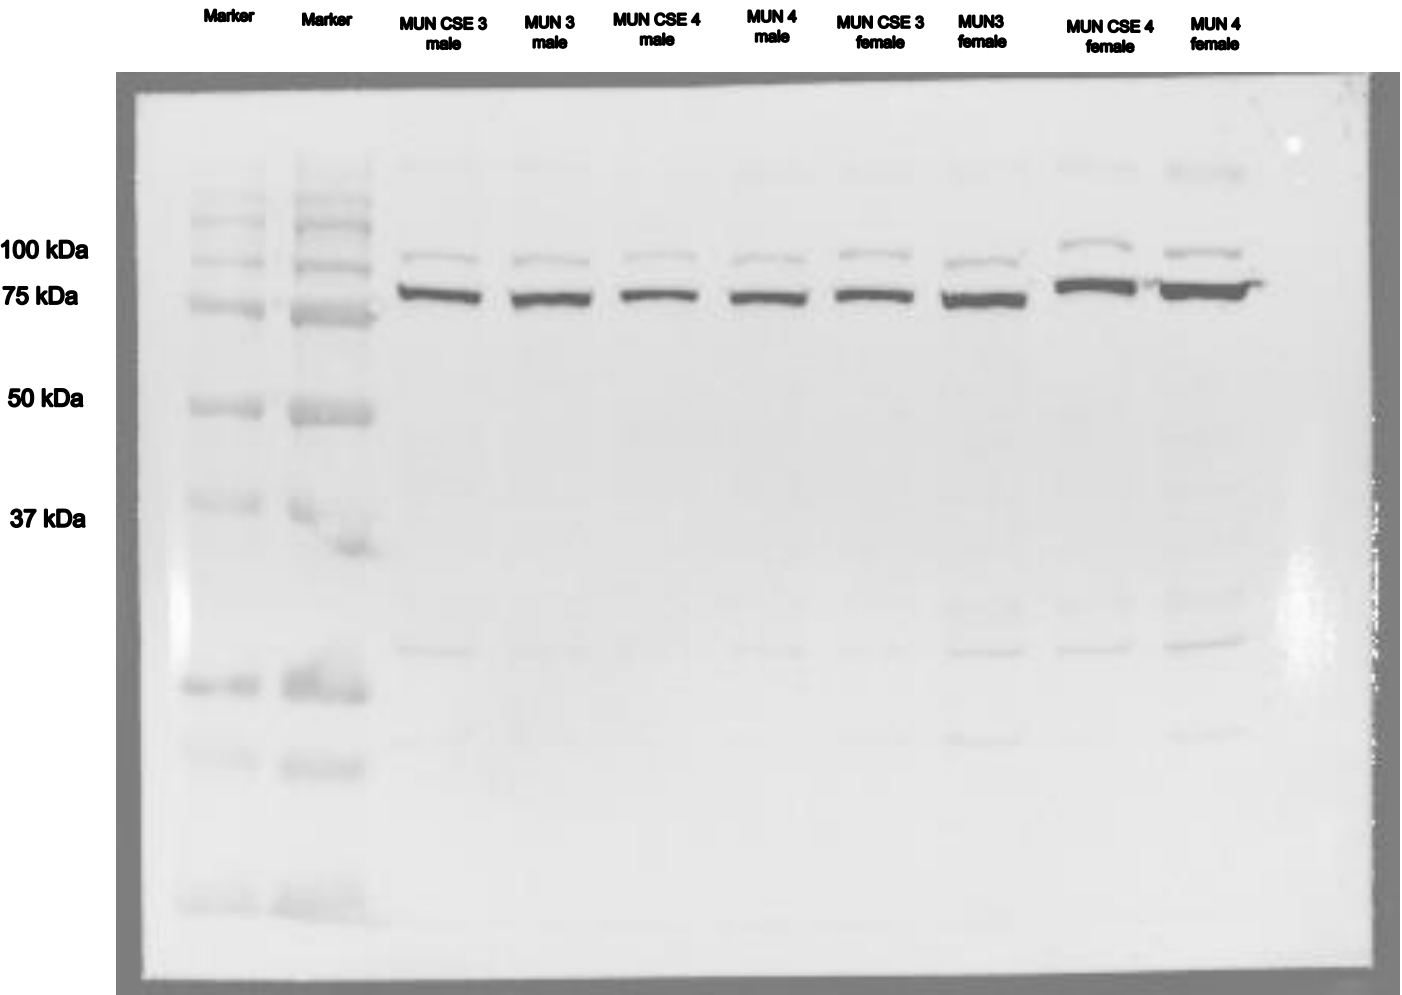

Heart. p-Nrf2

Gel 1

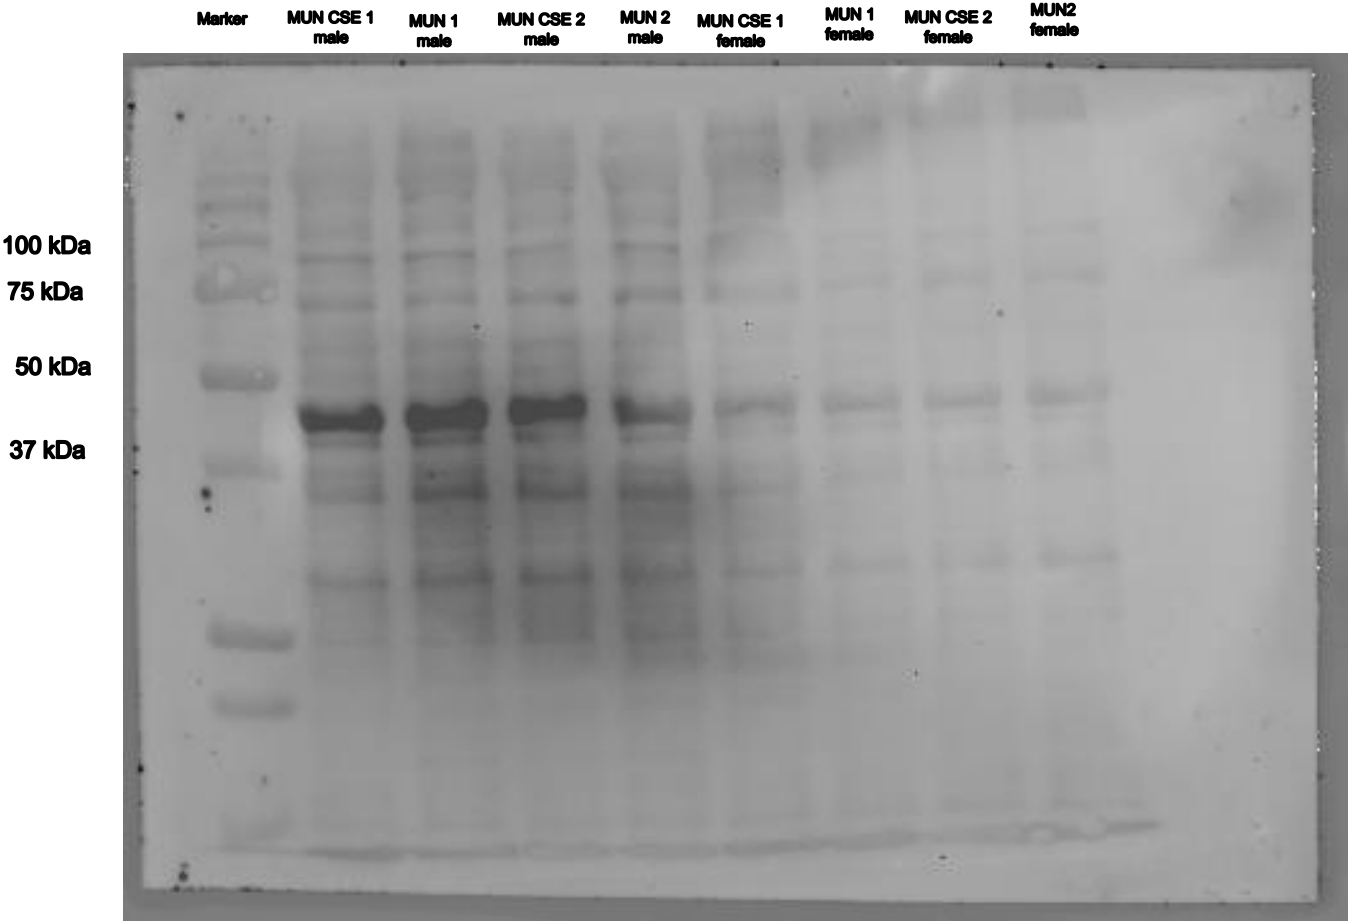

Gel 2

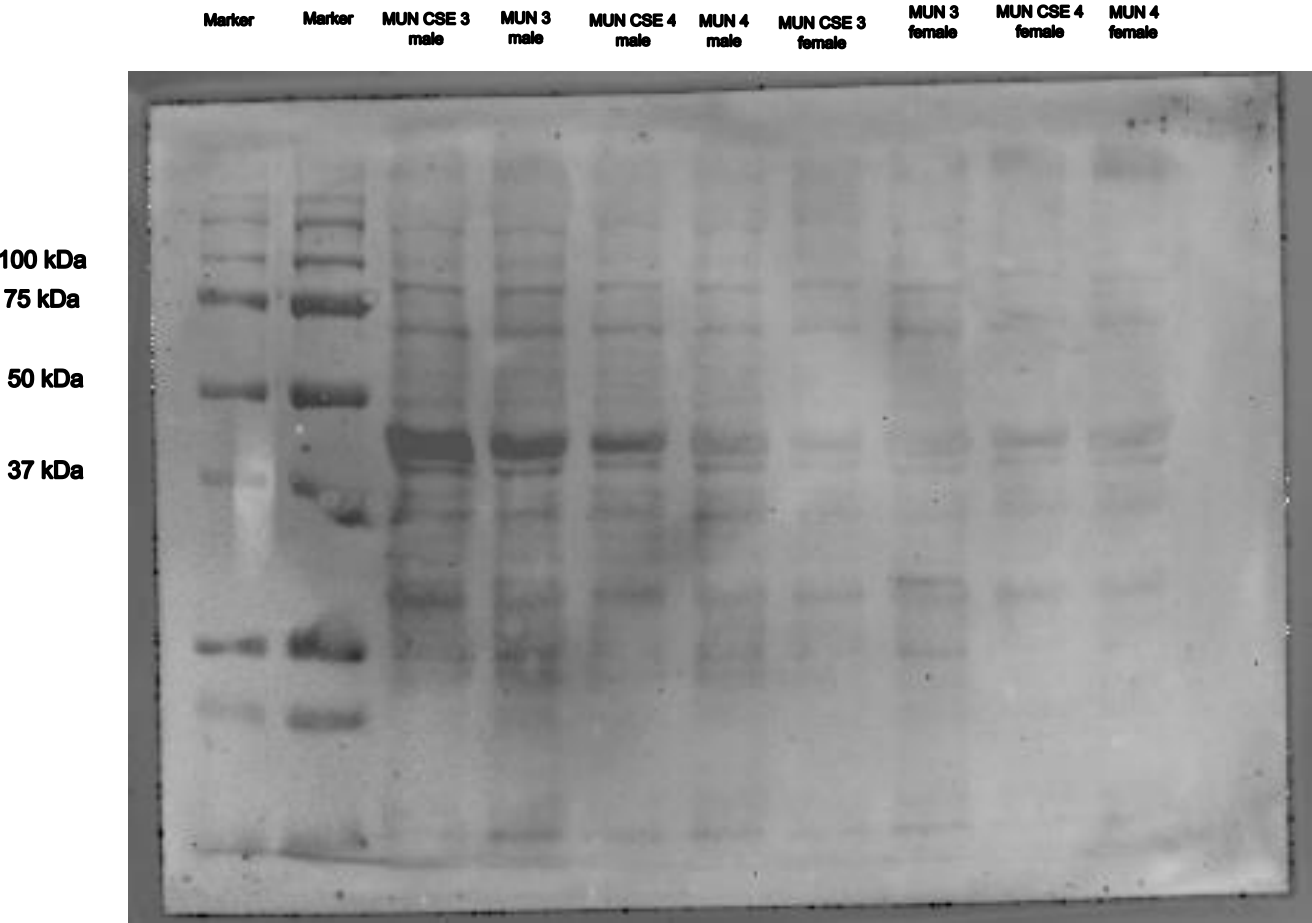

Heart. GADPH

Gel 1

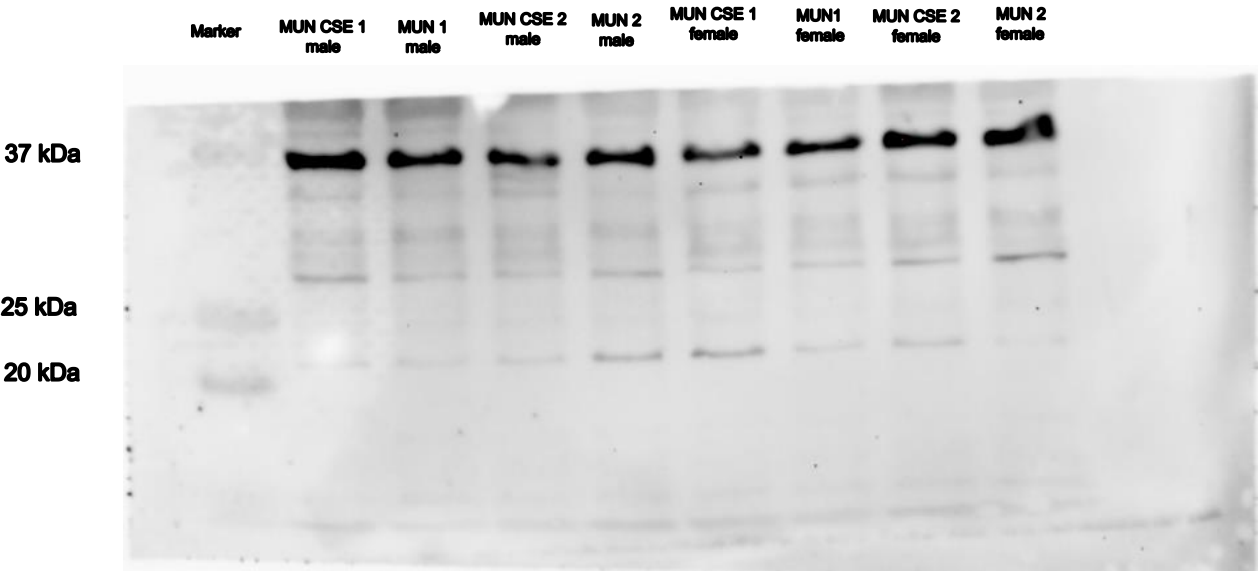

Gel 2

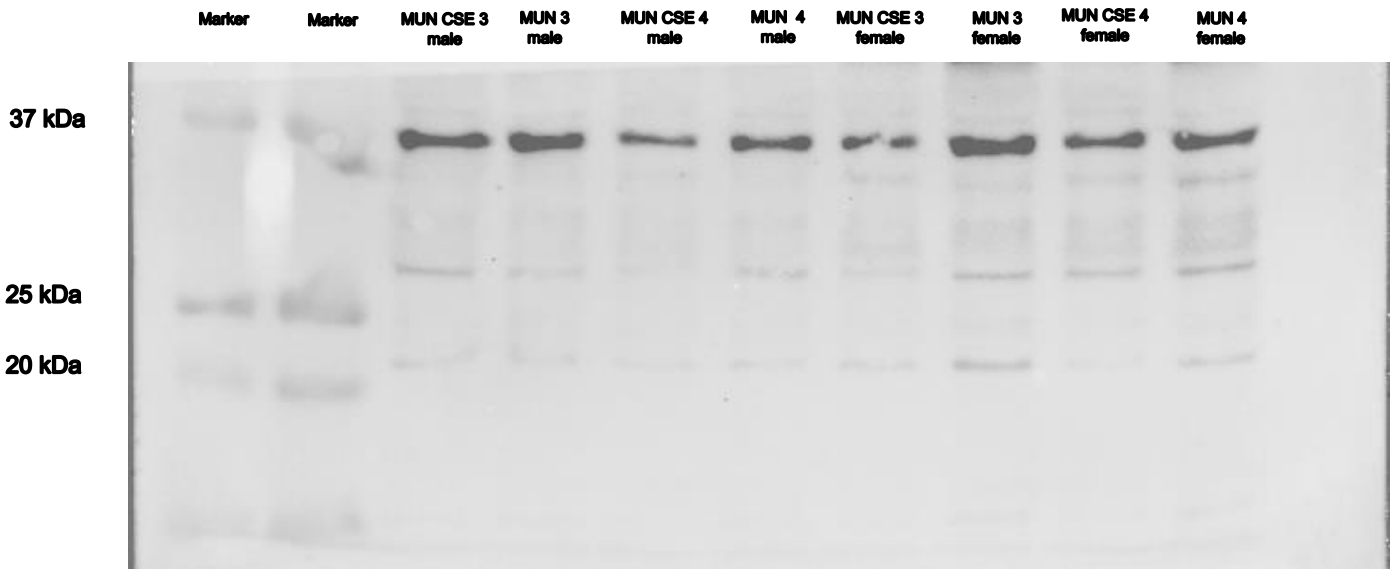

Aorta. Nrf2 total

Gel 3

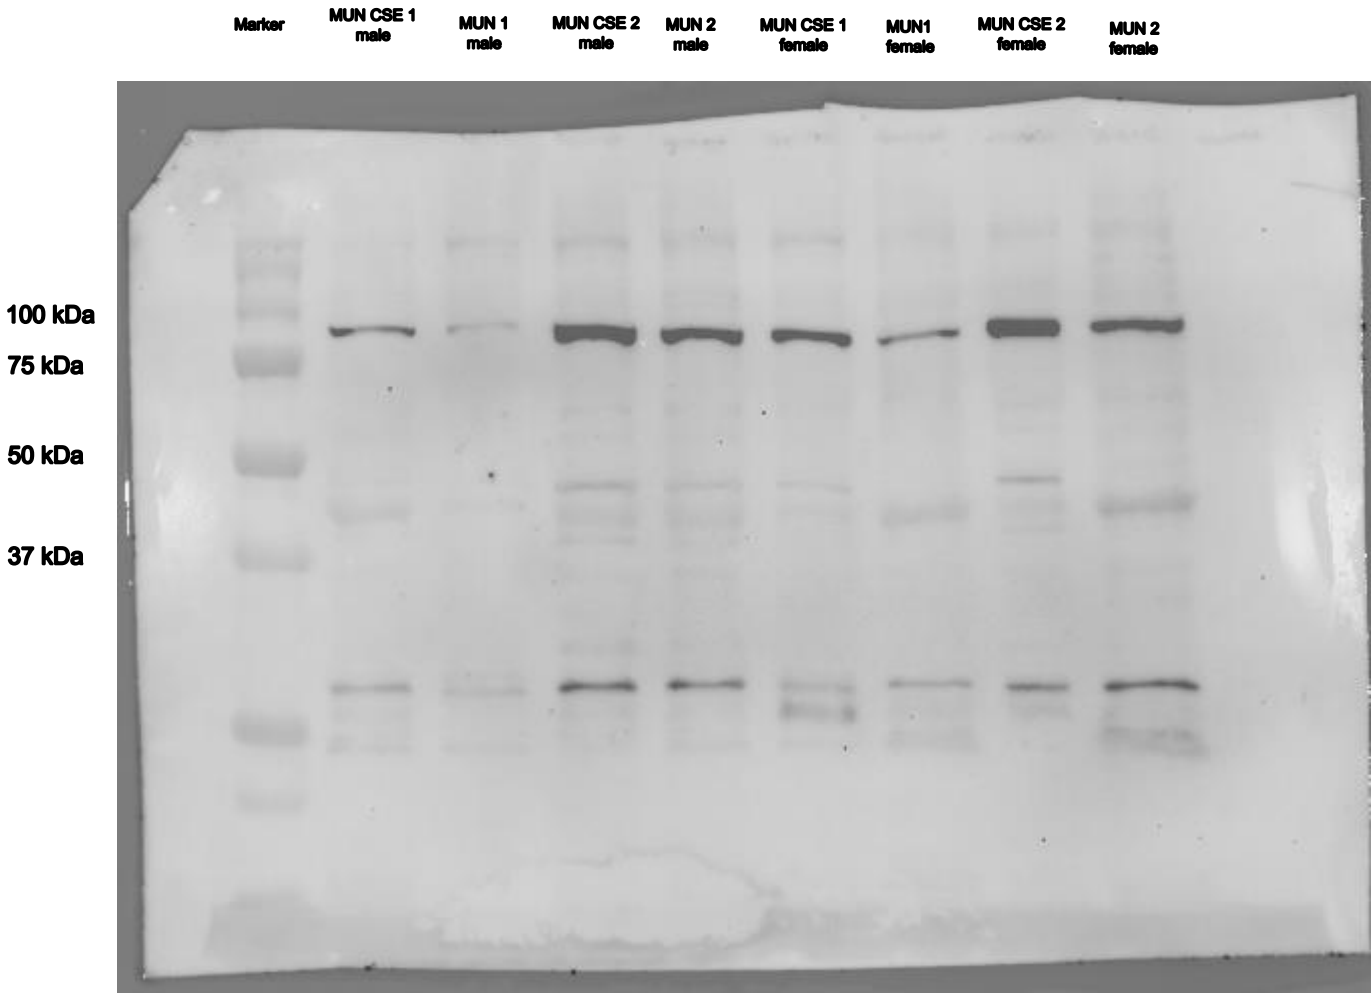

Gel 4

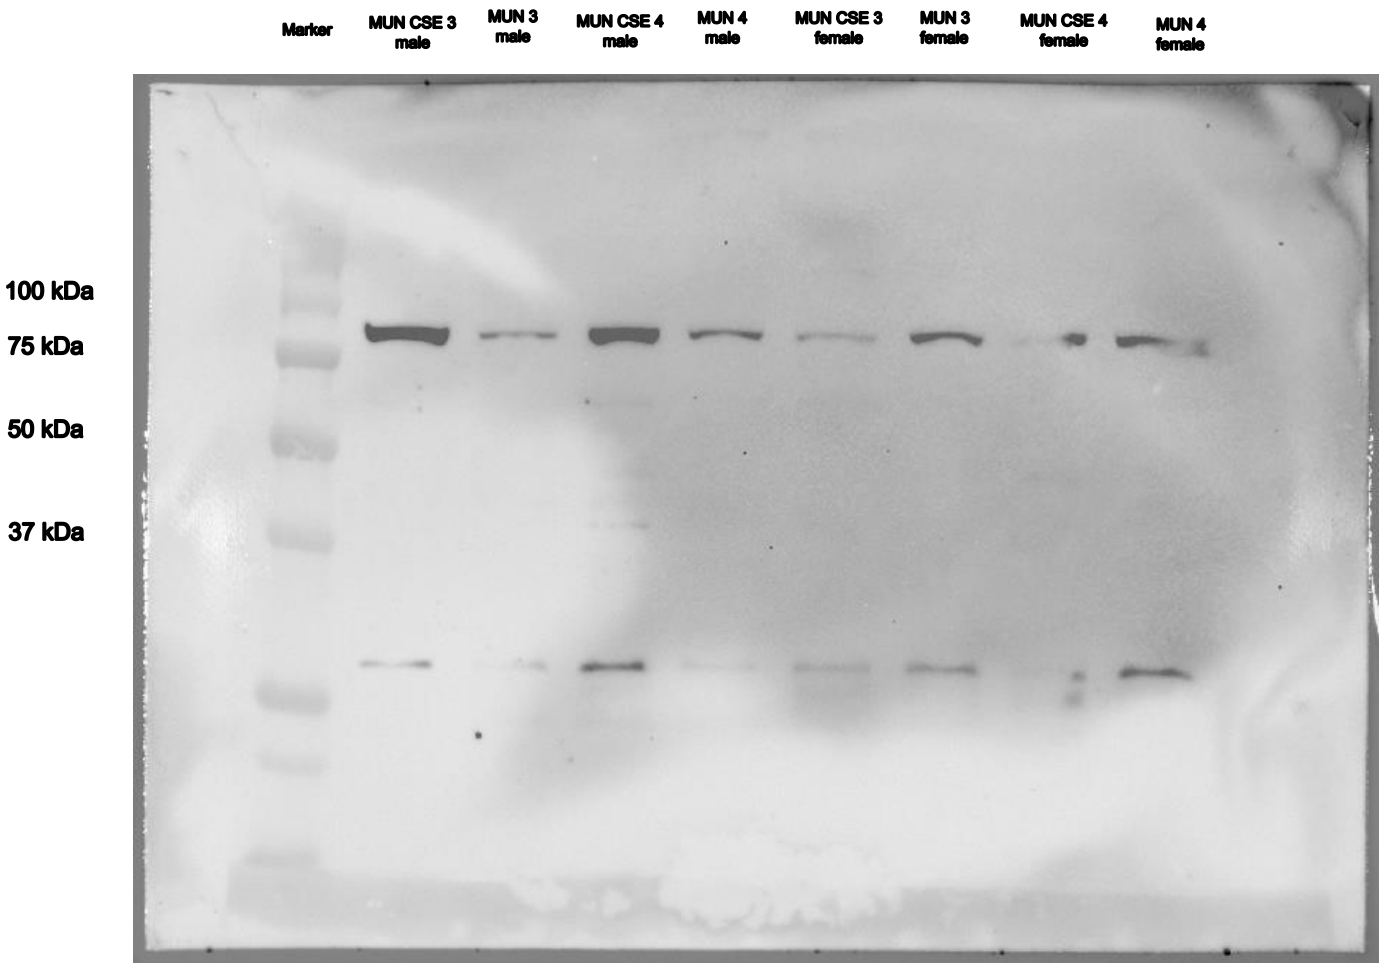

Aorta. p-Nrf2

Gel 3

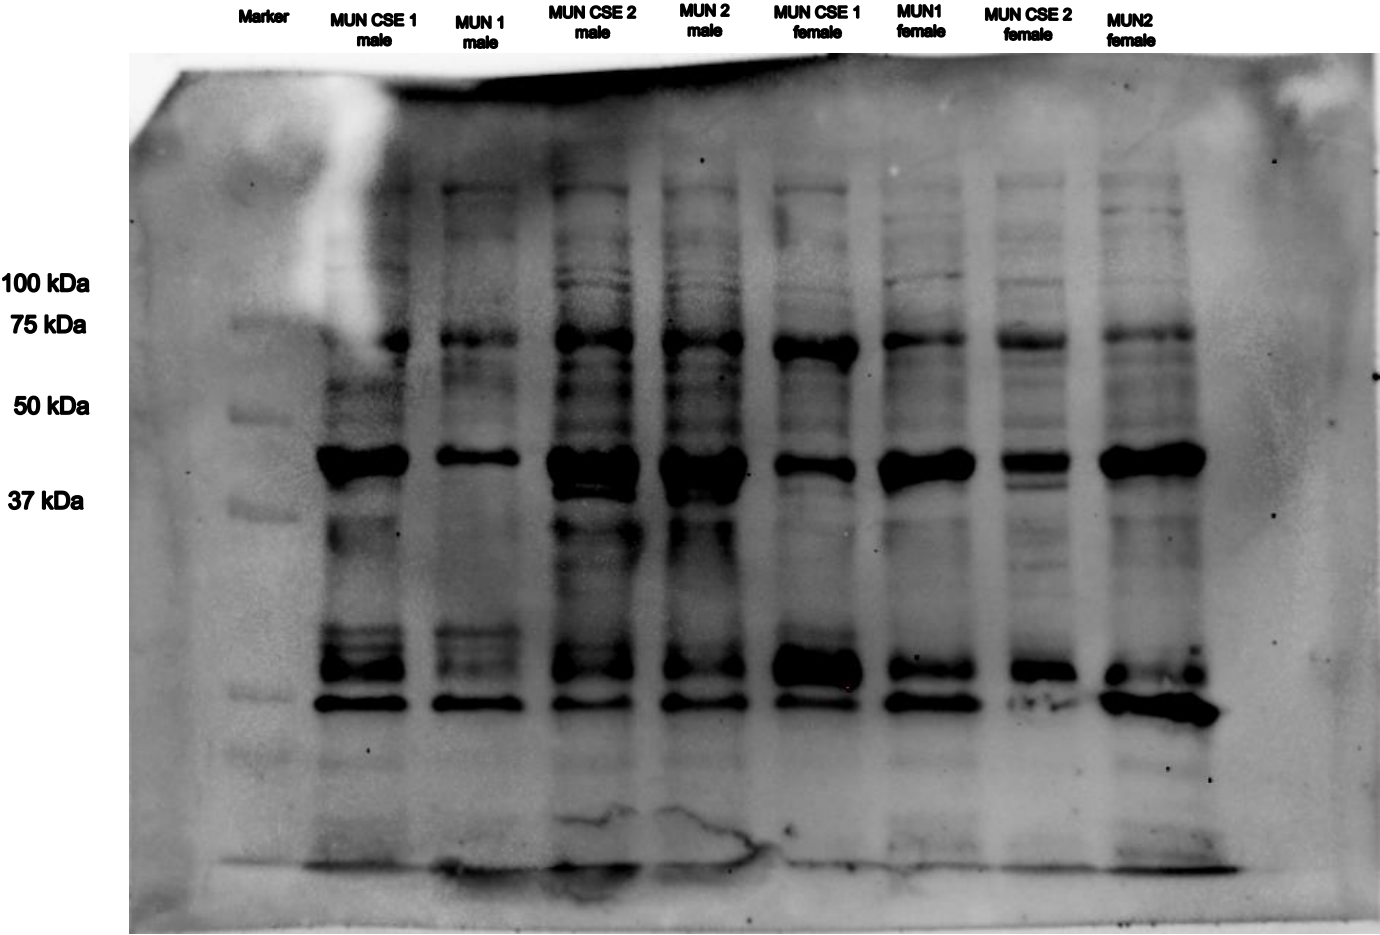



Gel 4

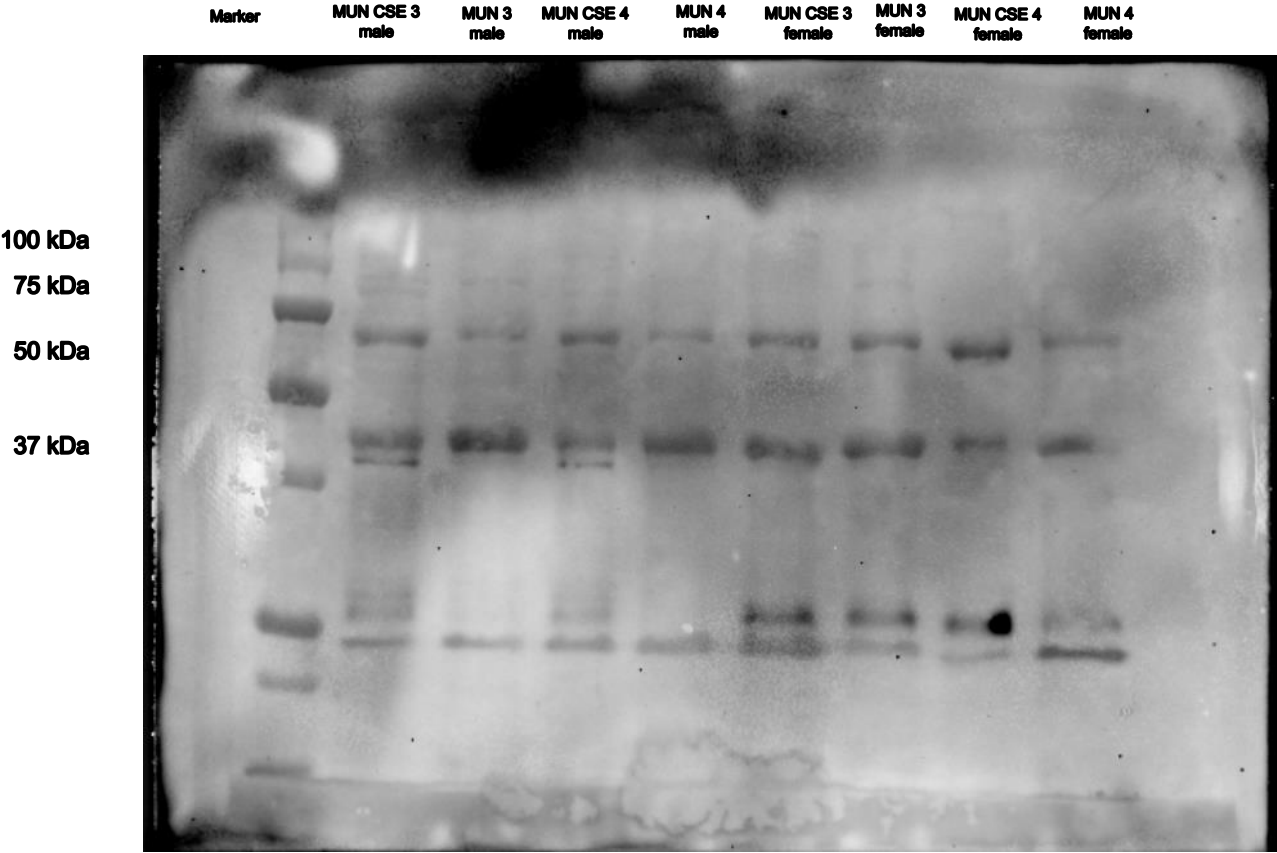

Aorta. GADPH

Gel 3

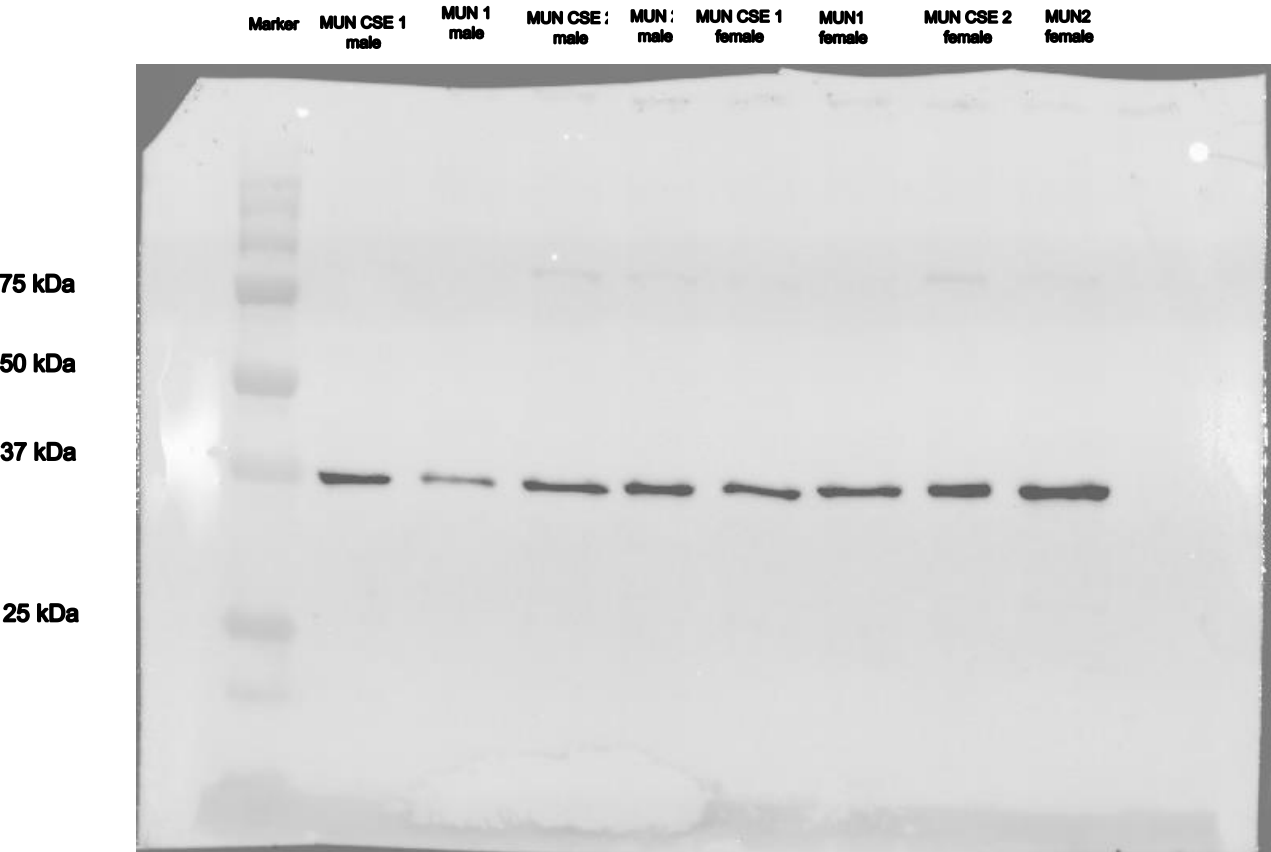

Gel 4

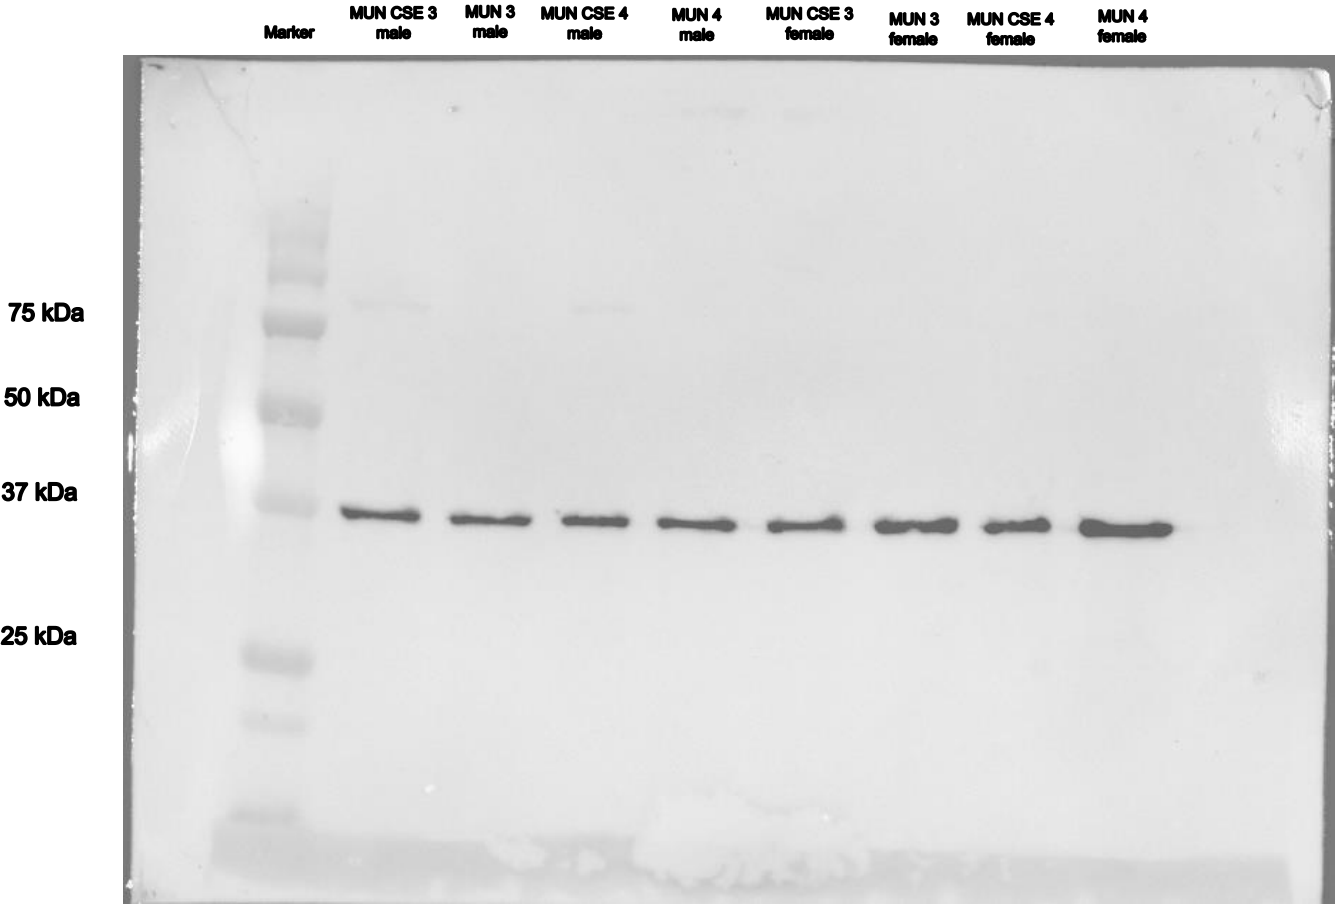

Heart. eNOS total

Gel 5

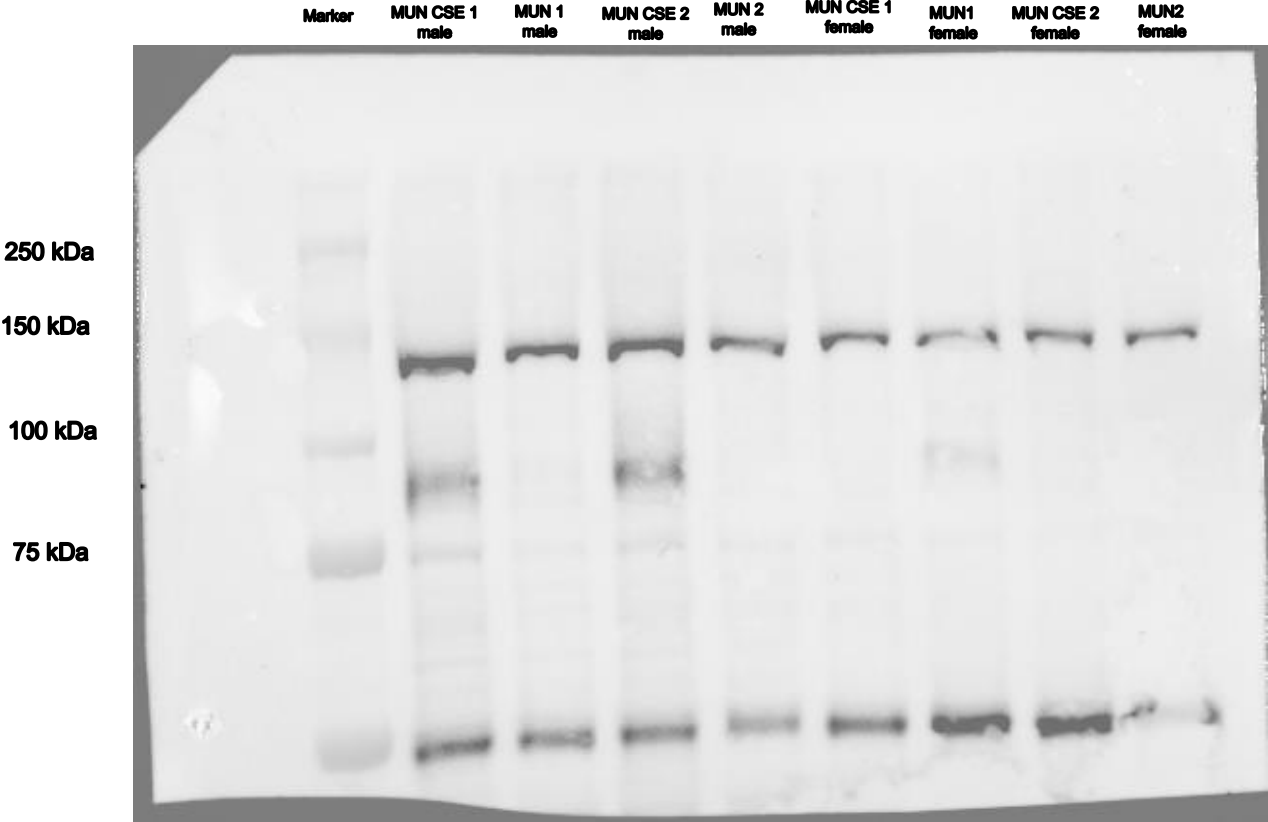

Gel 6

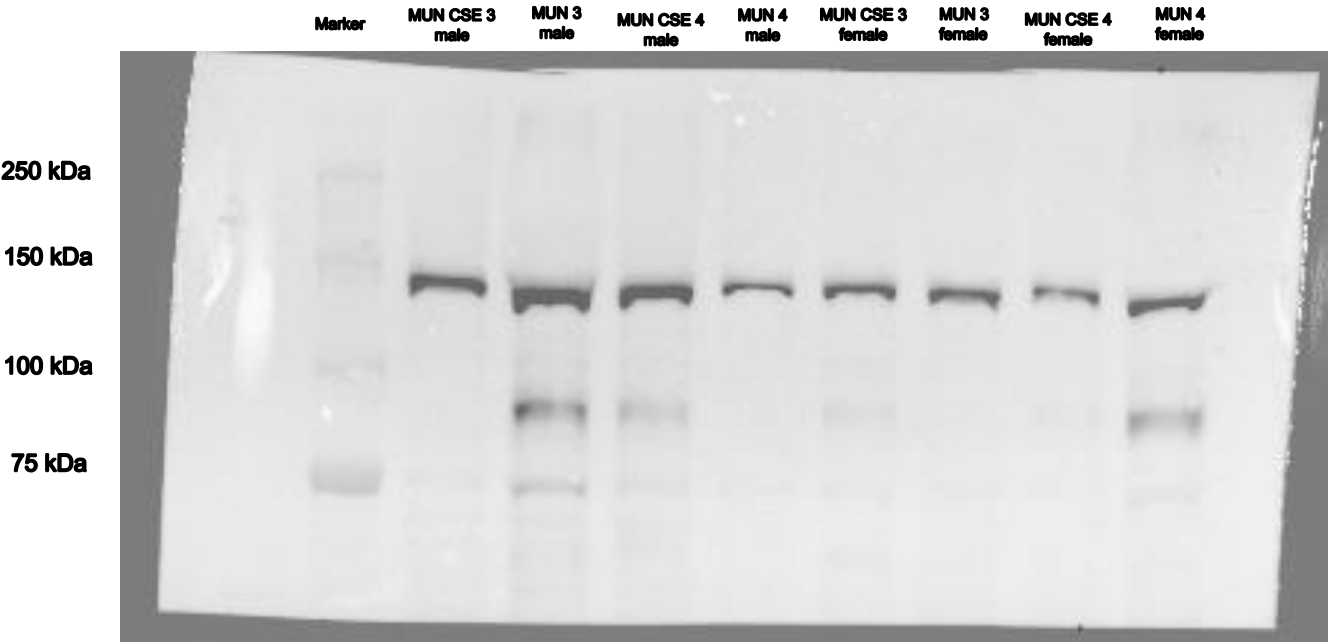

Heart. p-eNOS

Gel 5

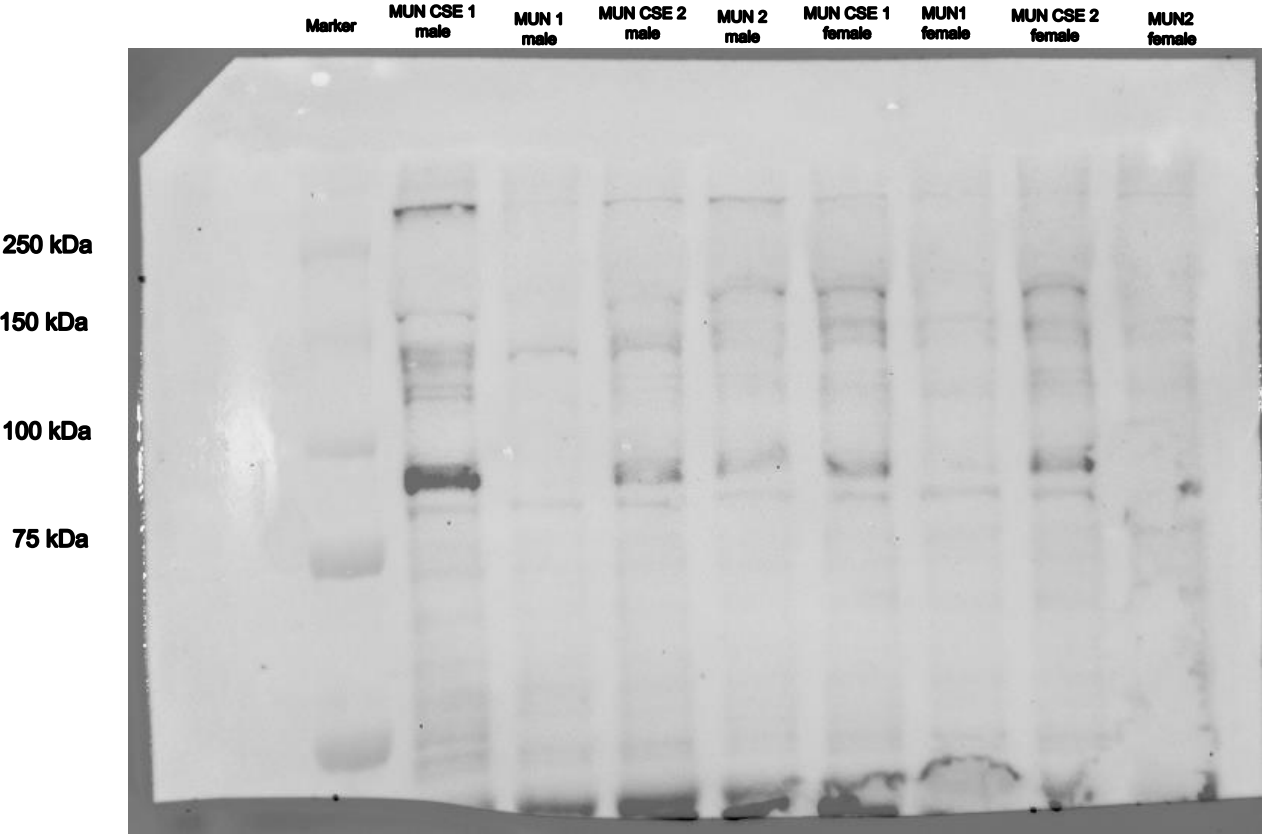

Gel 6

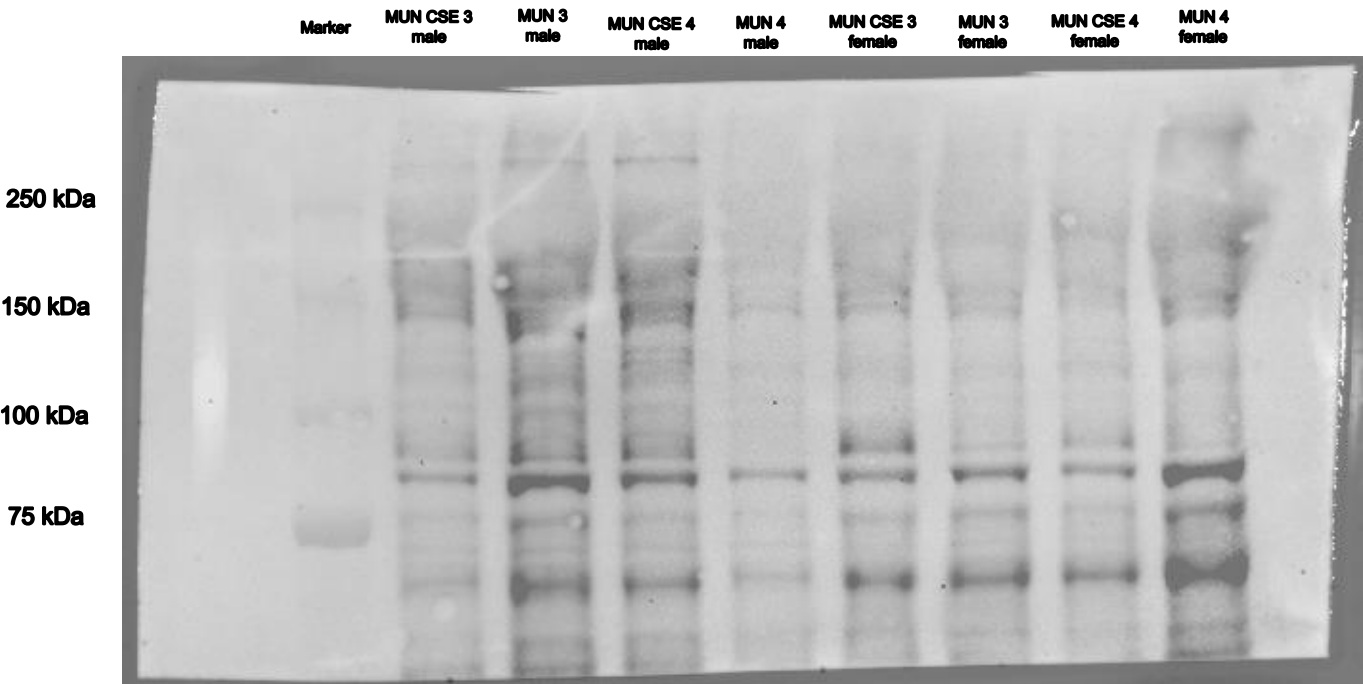

Heart. GADPH

Gel 5

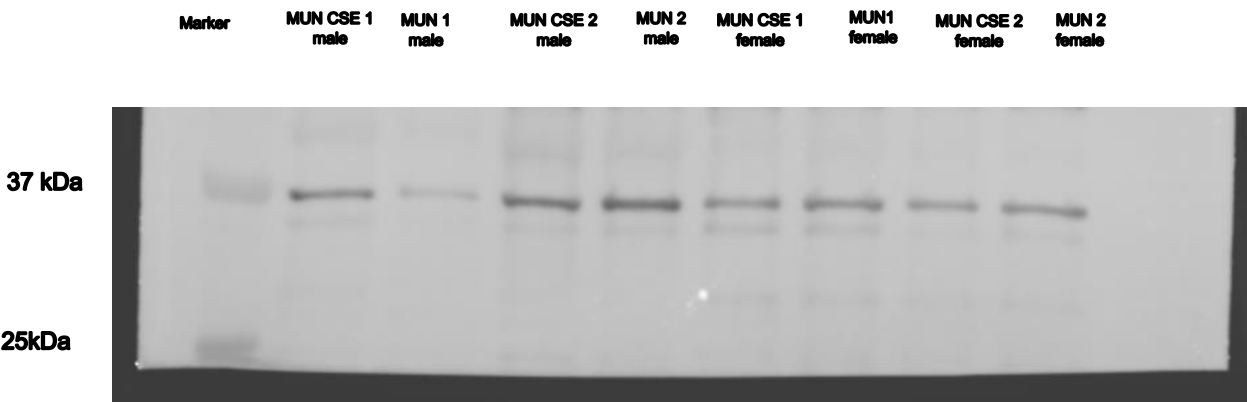

Gel 6

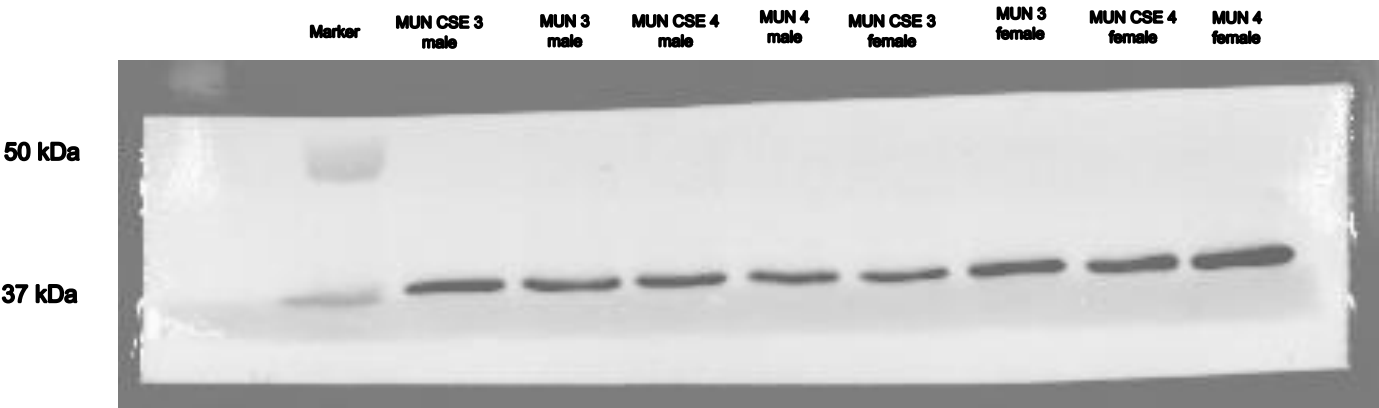



Aorta. eNOS total

Gel 7

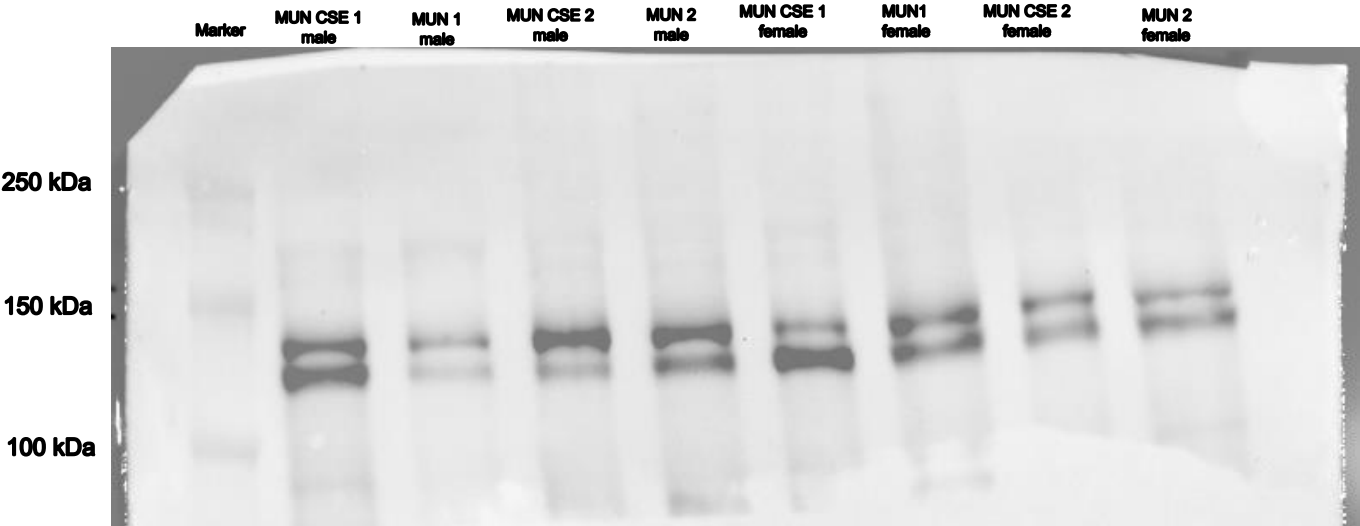

Gel 8

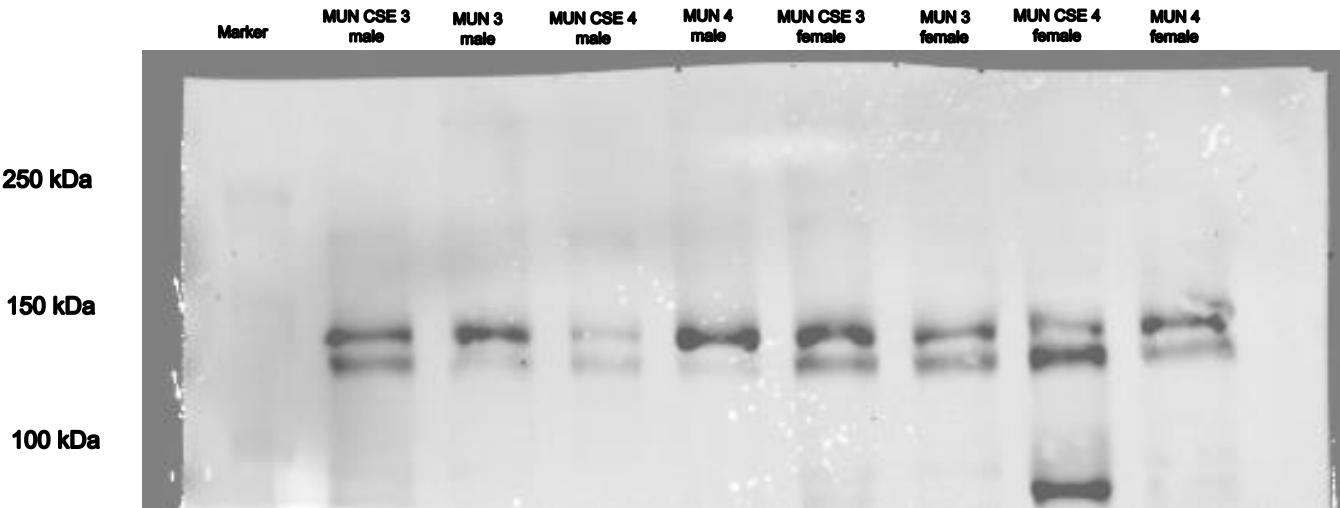

Aorta. GADPH

Gel 7

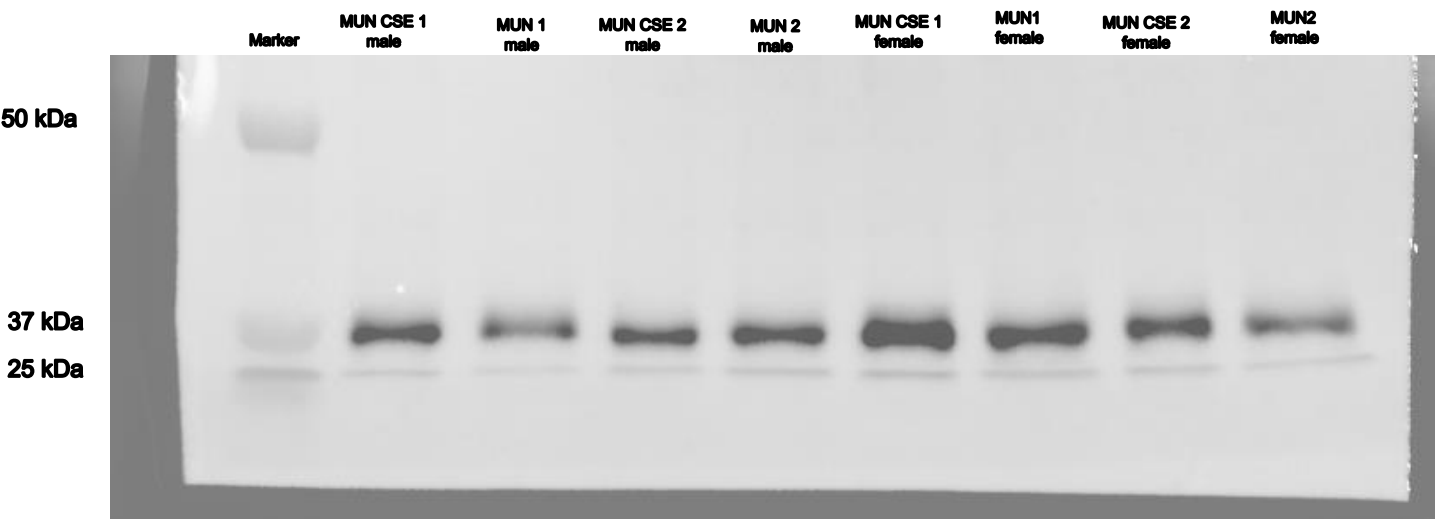

Gel 8

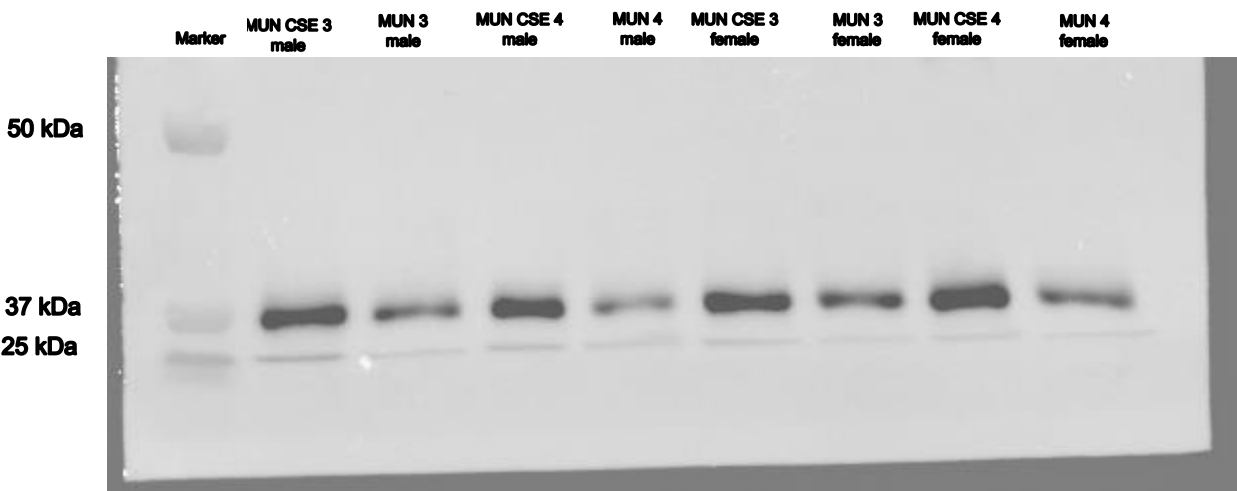

Heart. Catalase

Gel 9

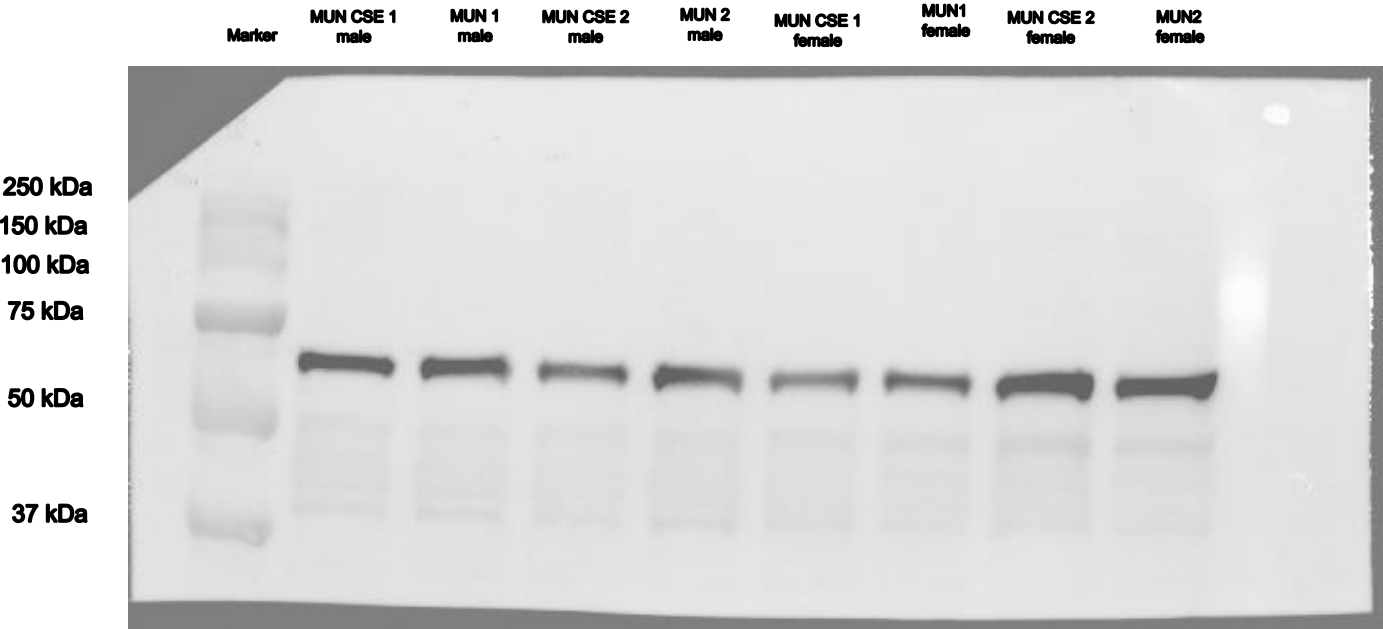

Gel 10

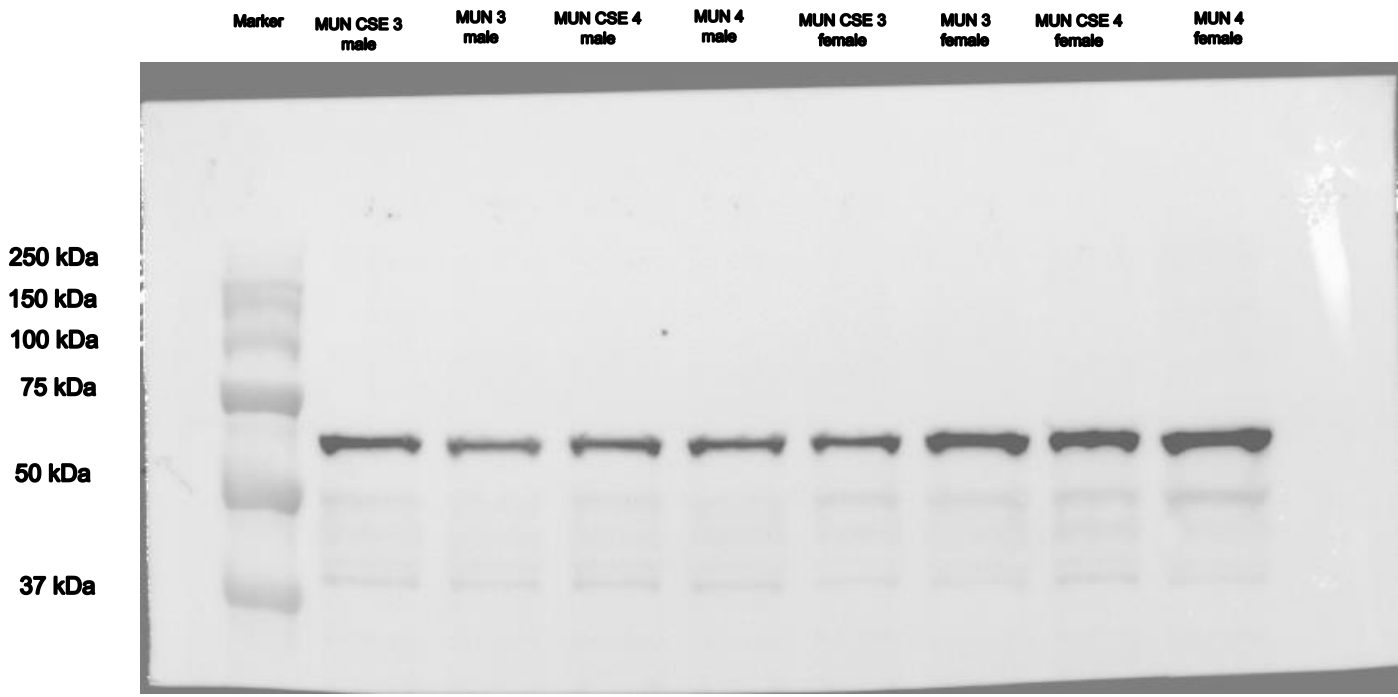

Heart. SOD 2

Gel 9

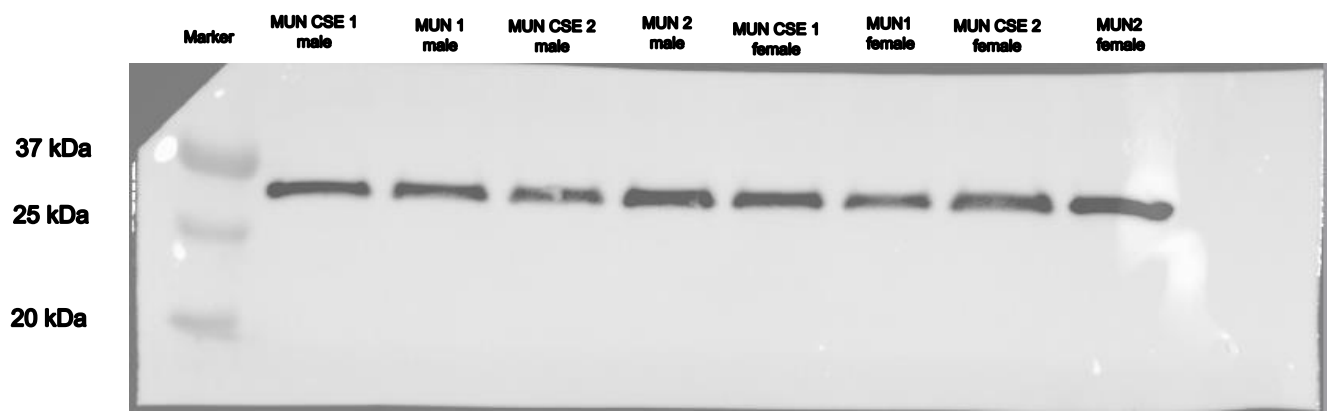

Gel 10

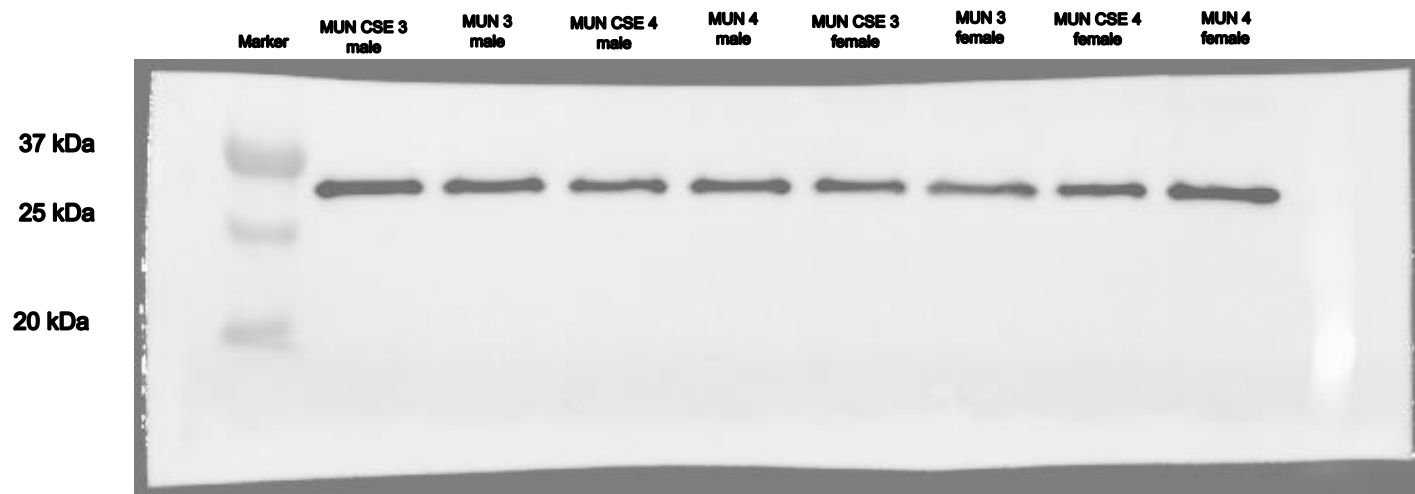

Heart. GAPDH

Gel 9

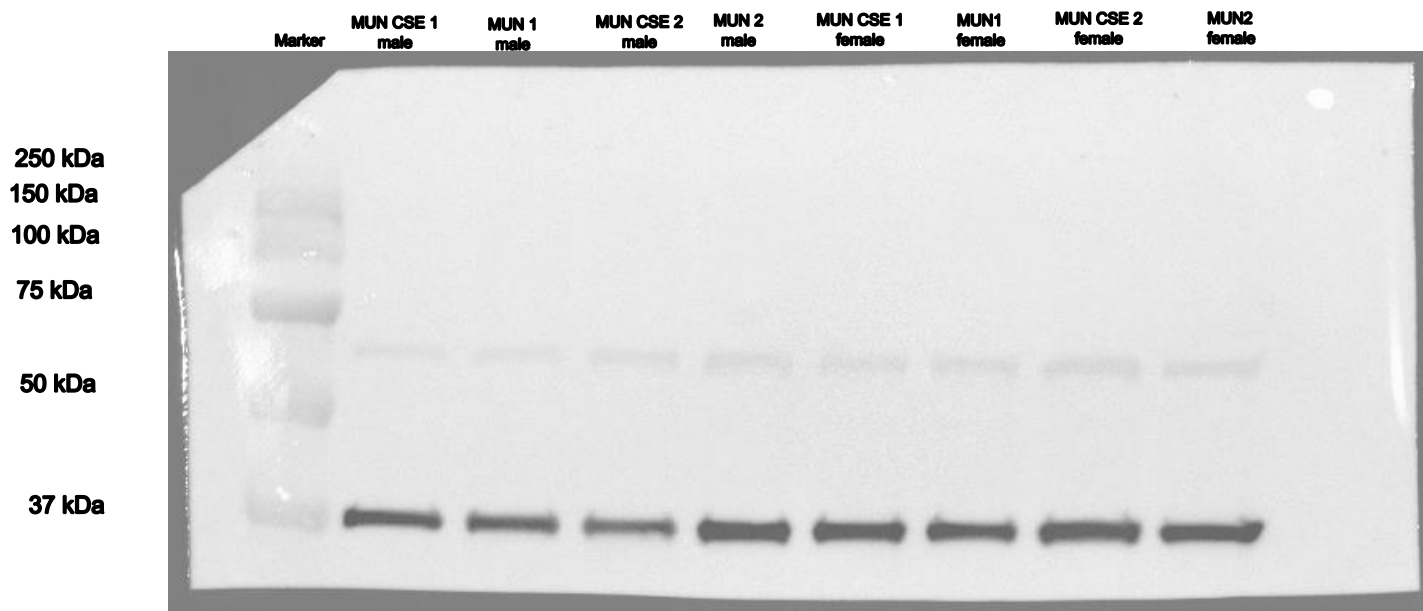

Gel 10

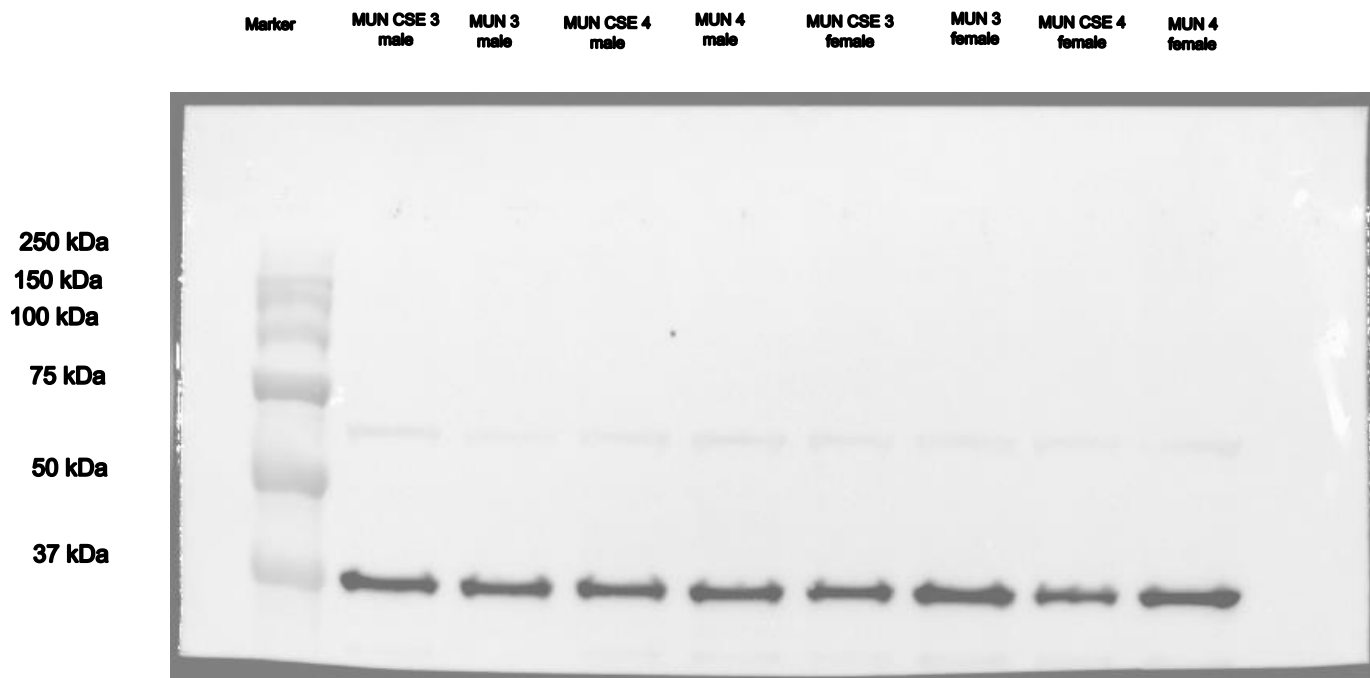

Heart. HO-1

Gel 11

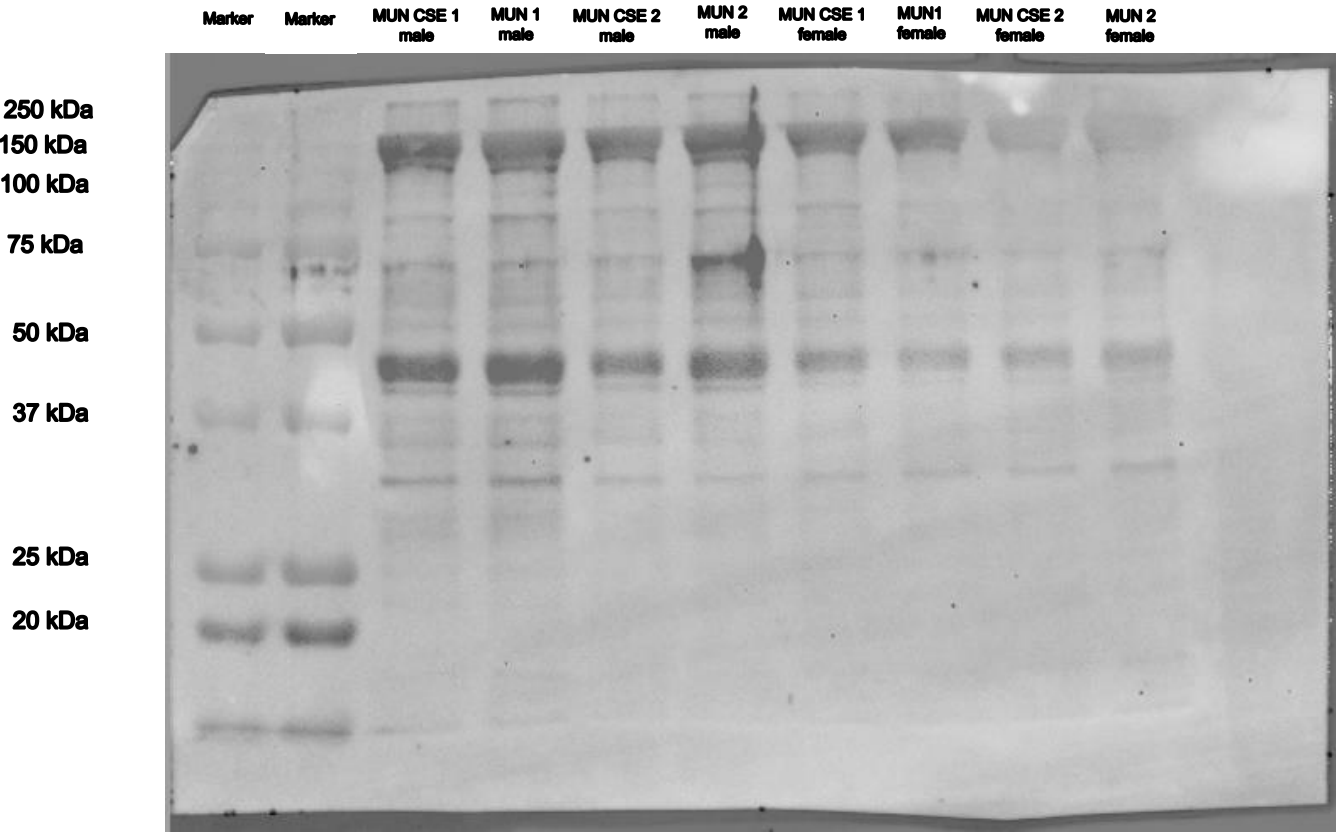

Gel 12

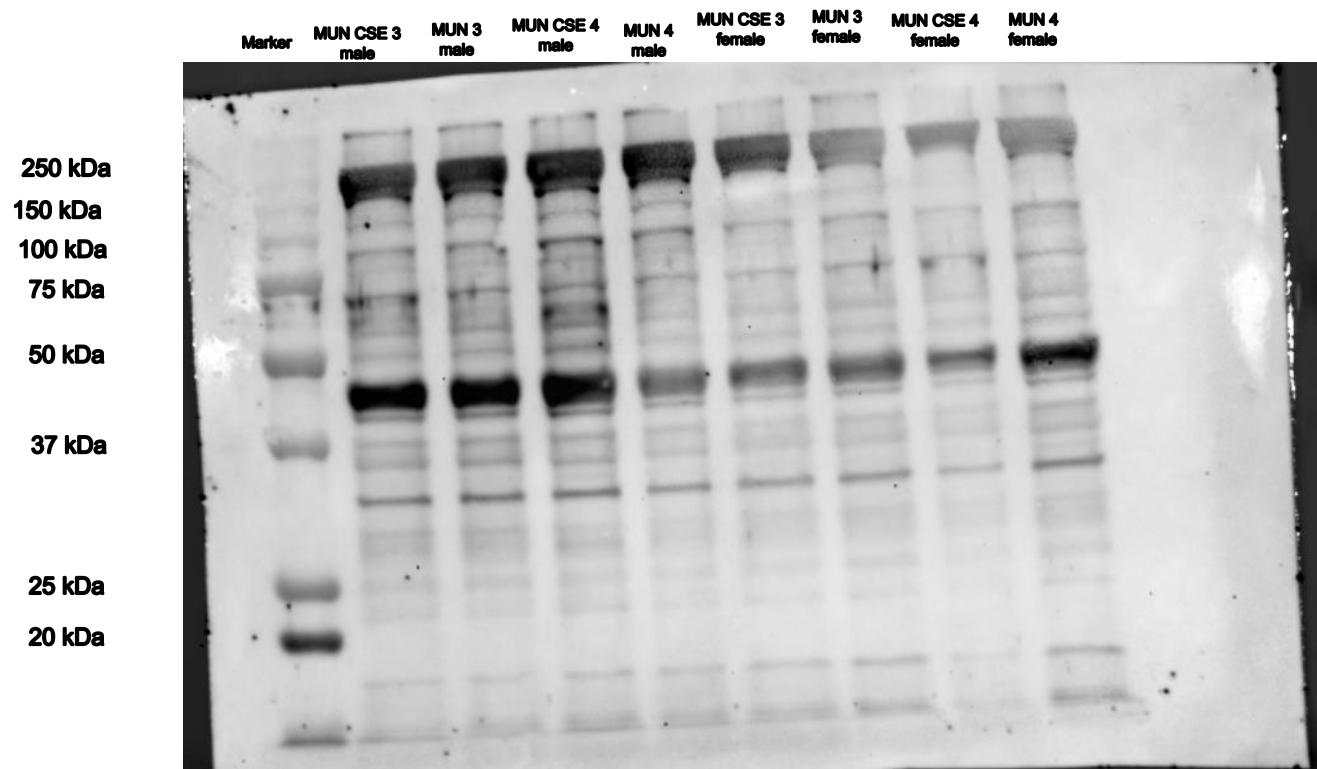

Heart. UCP-2

Gel 11

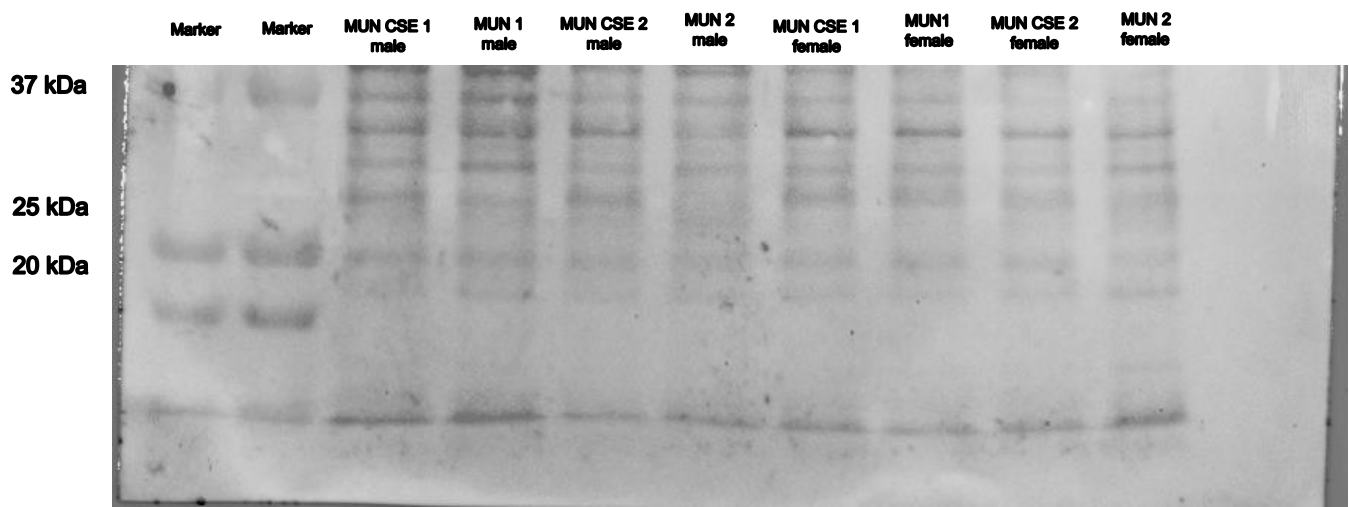

Gel 12

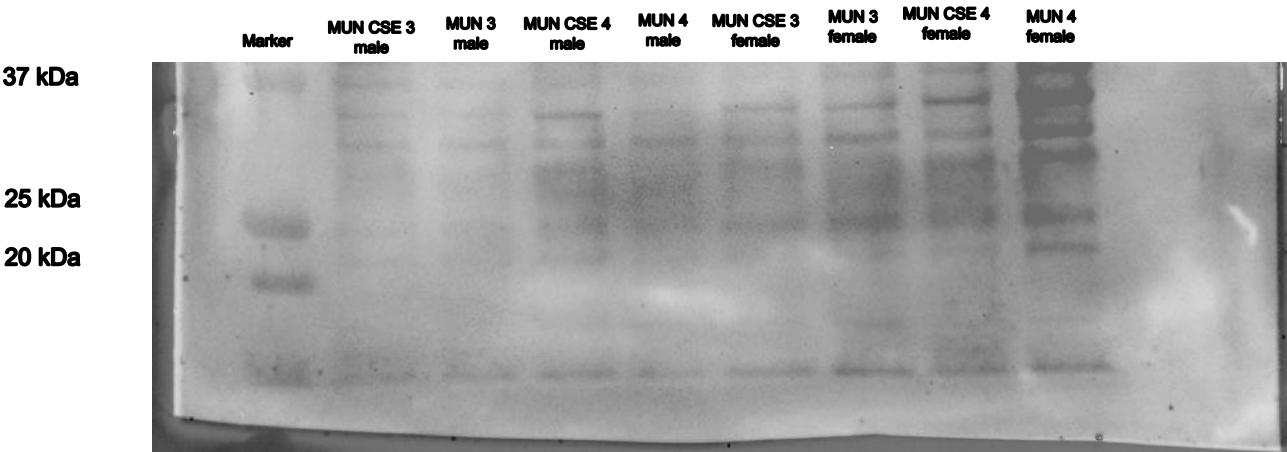

Heart. GAPDH

Gel 11

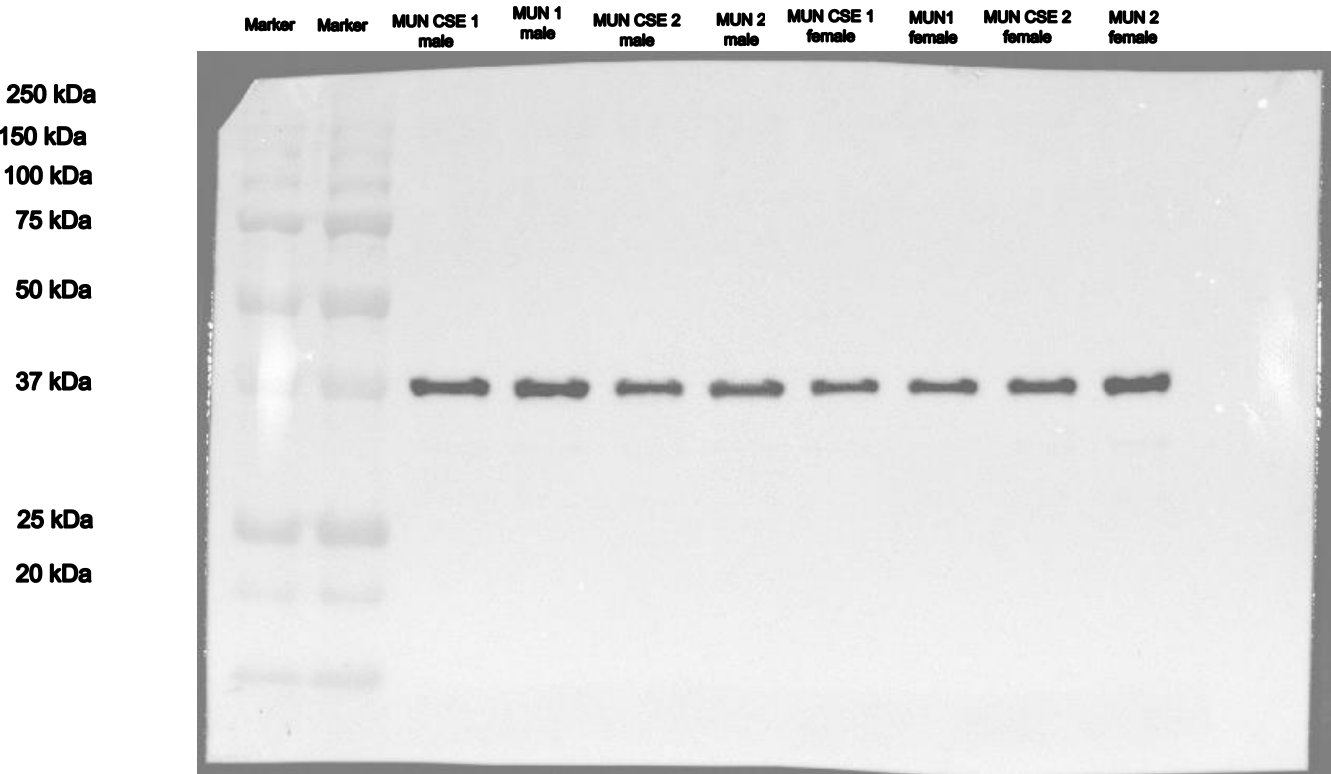



Gel 12

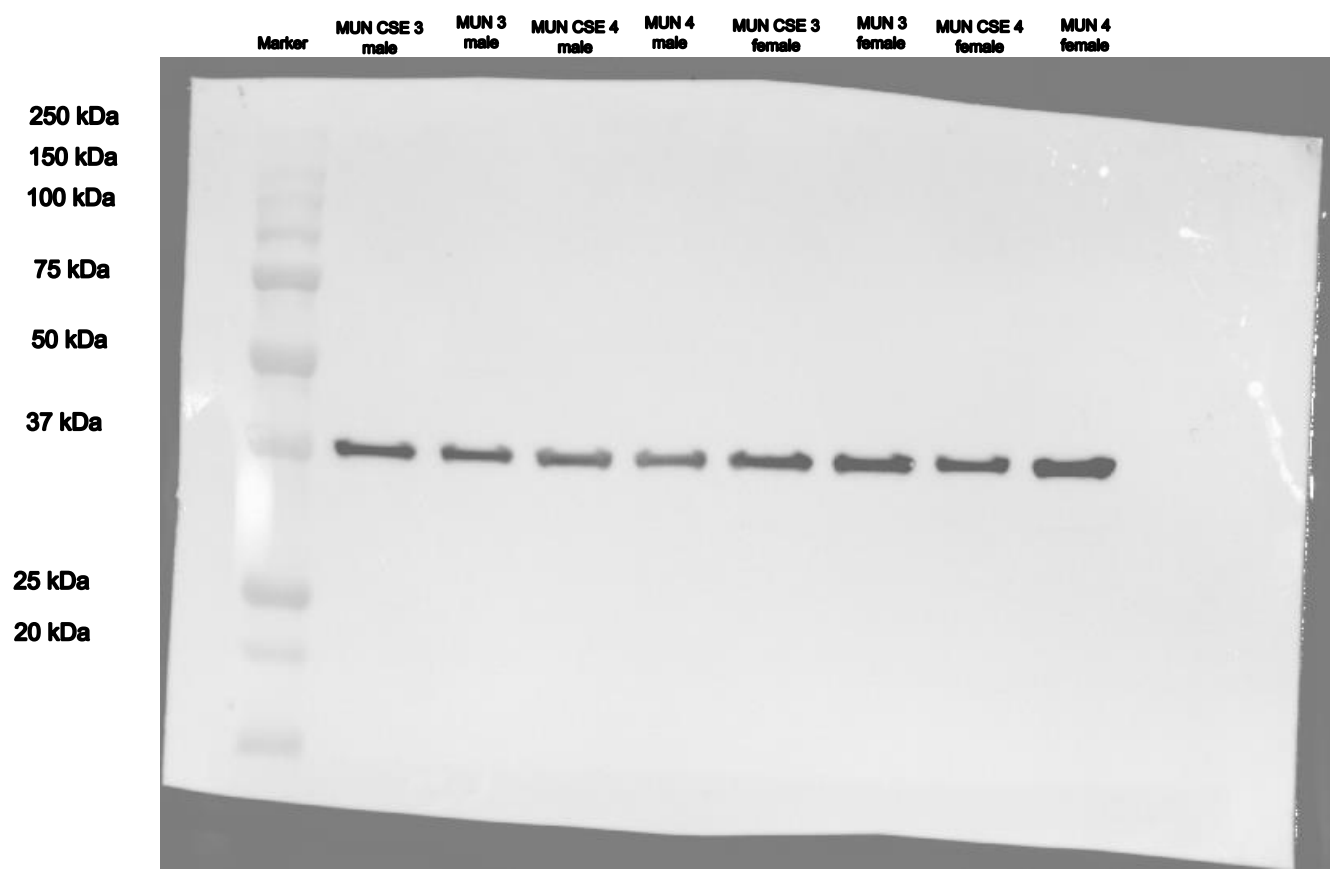

Aorta. Catalase

Gel 13

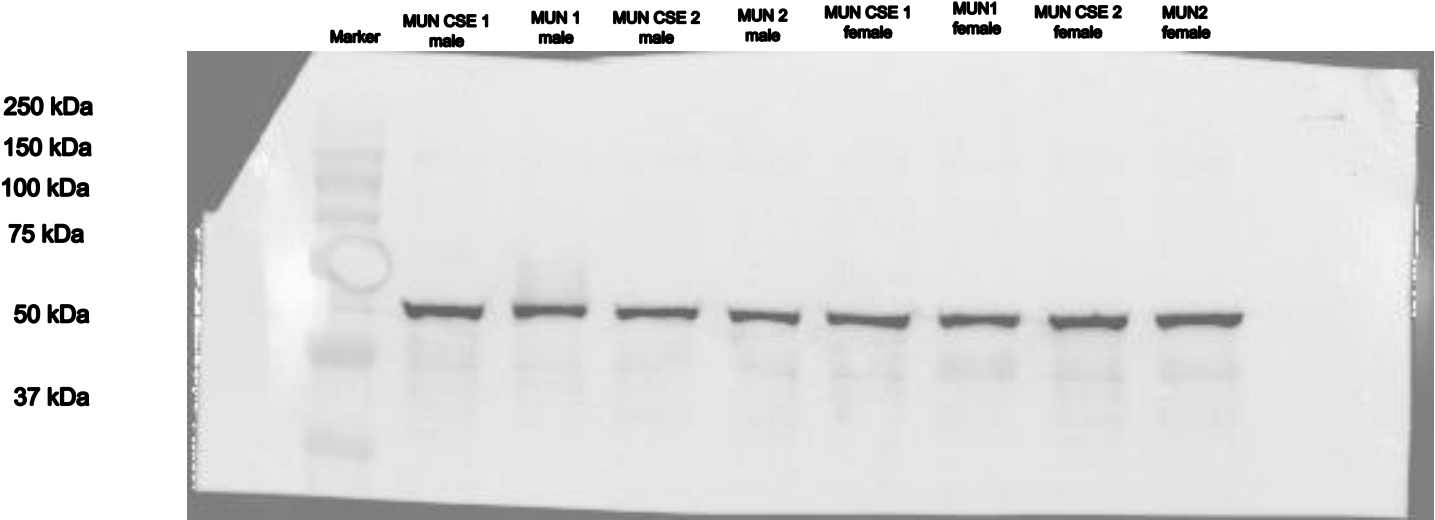

Gel 14

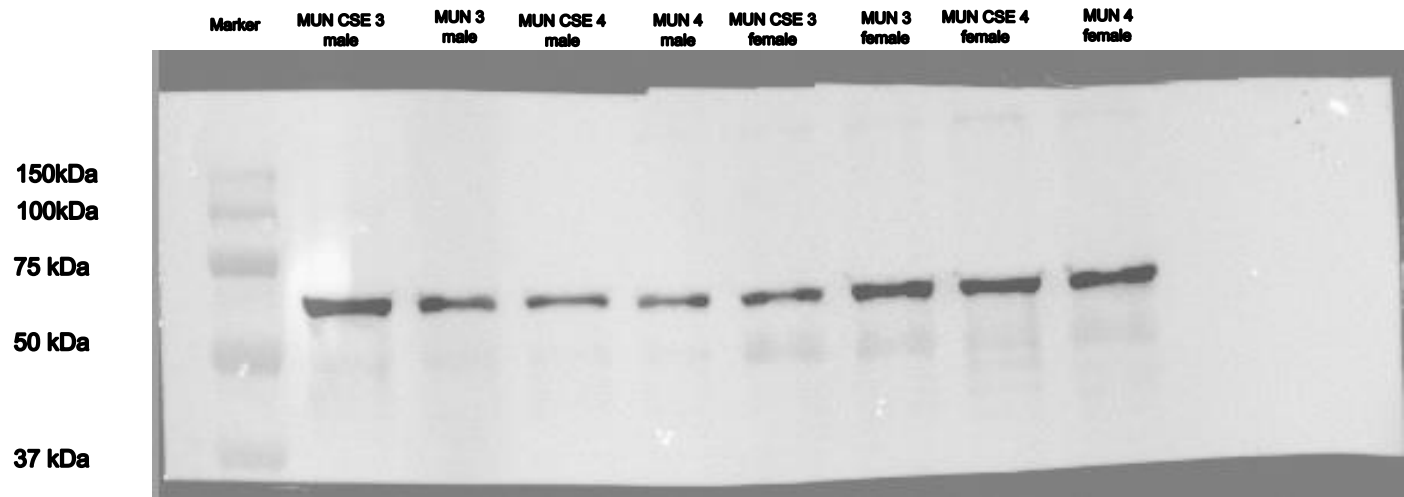

Aorta. SOD-2

Gel 13

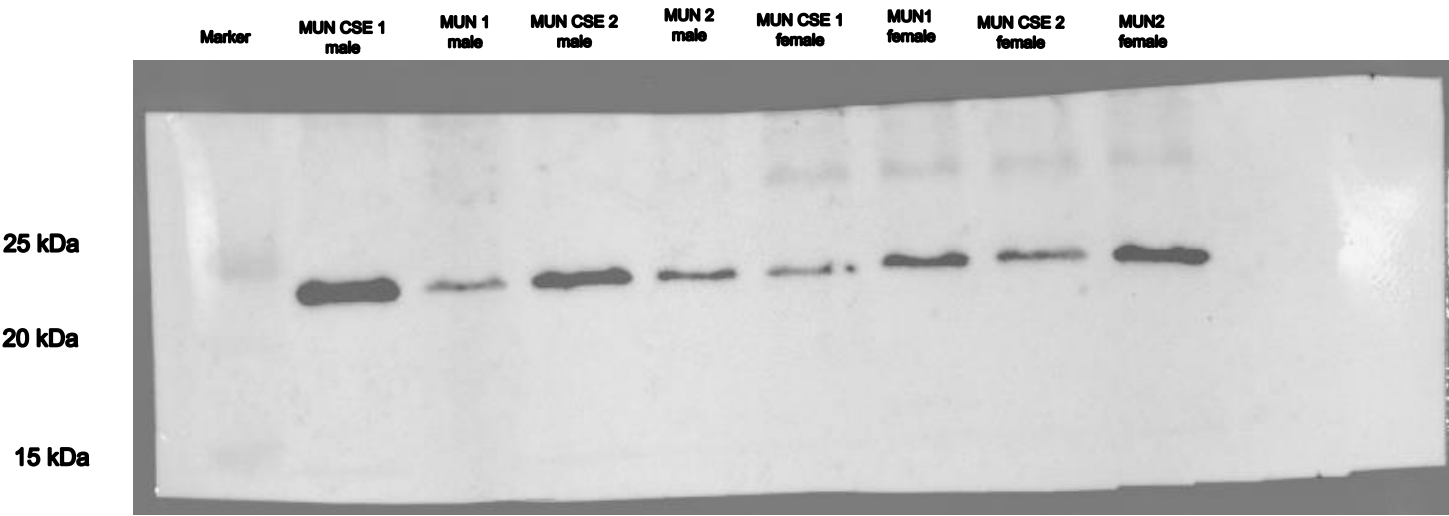

Gel 14

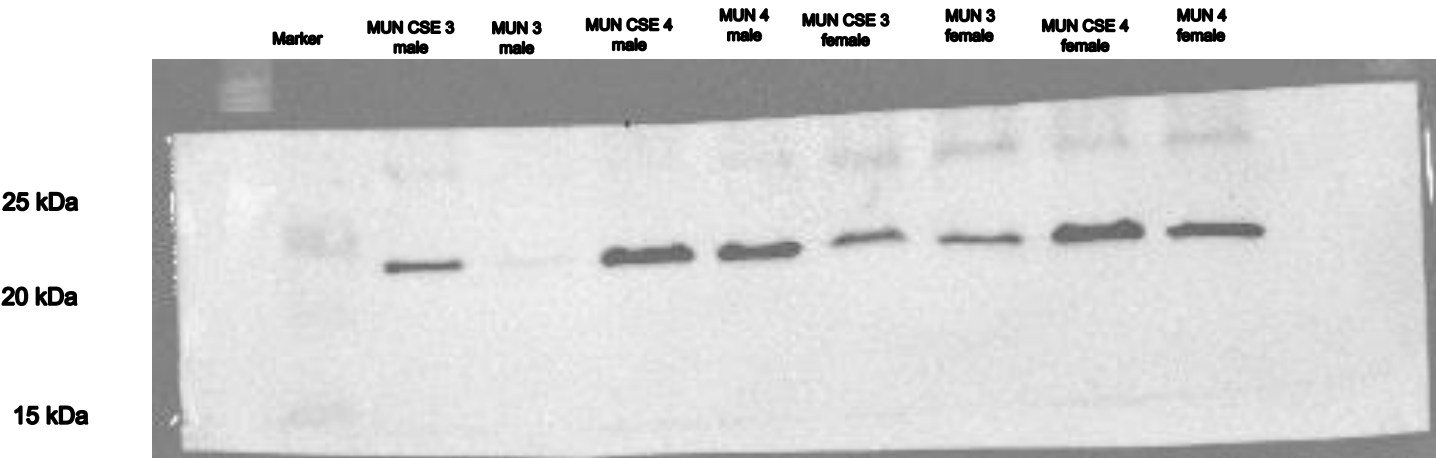

Aorta. GAPDH

Gel 13

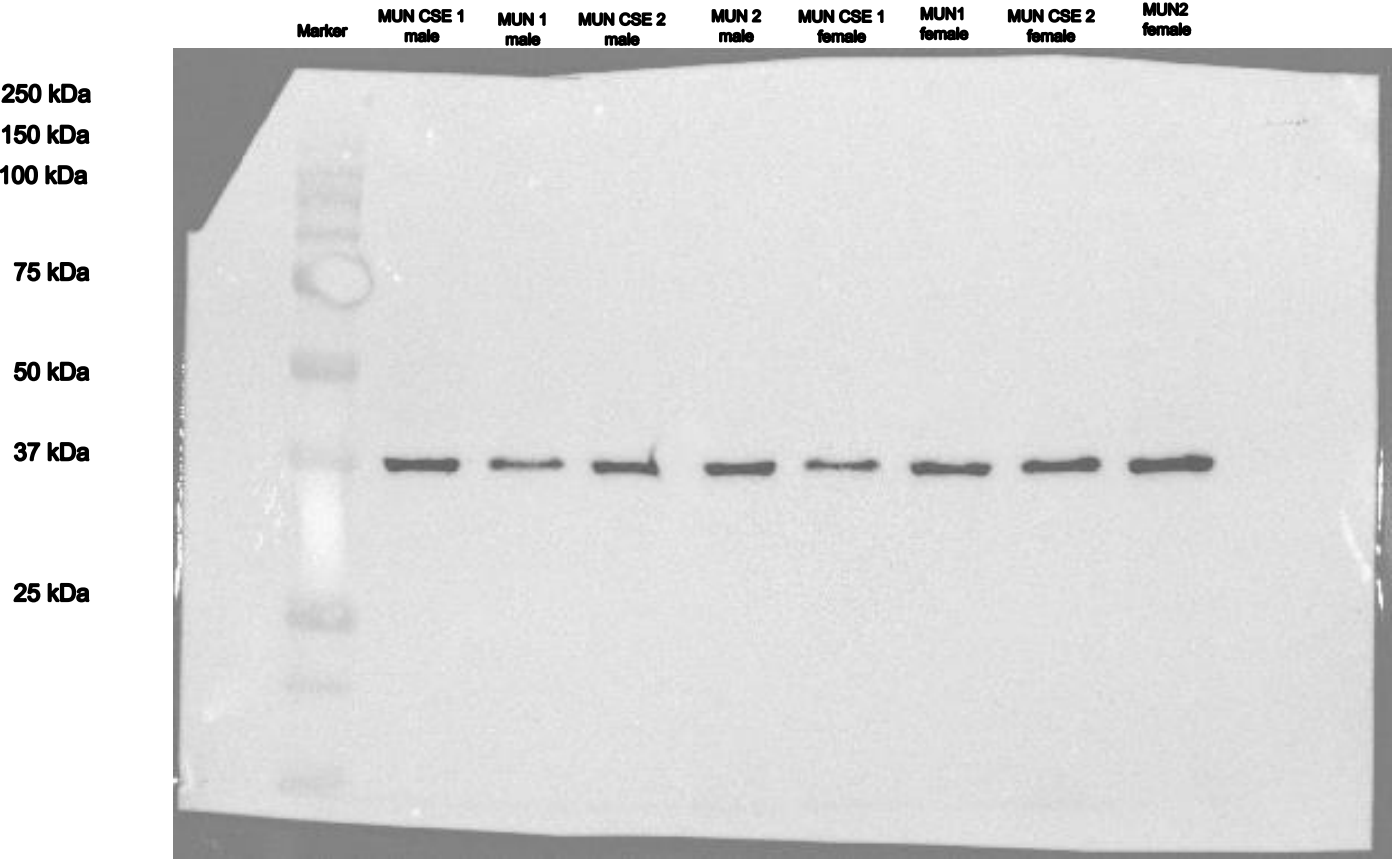

Gel 14

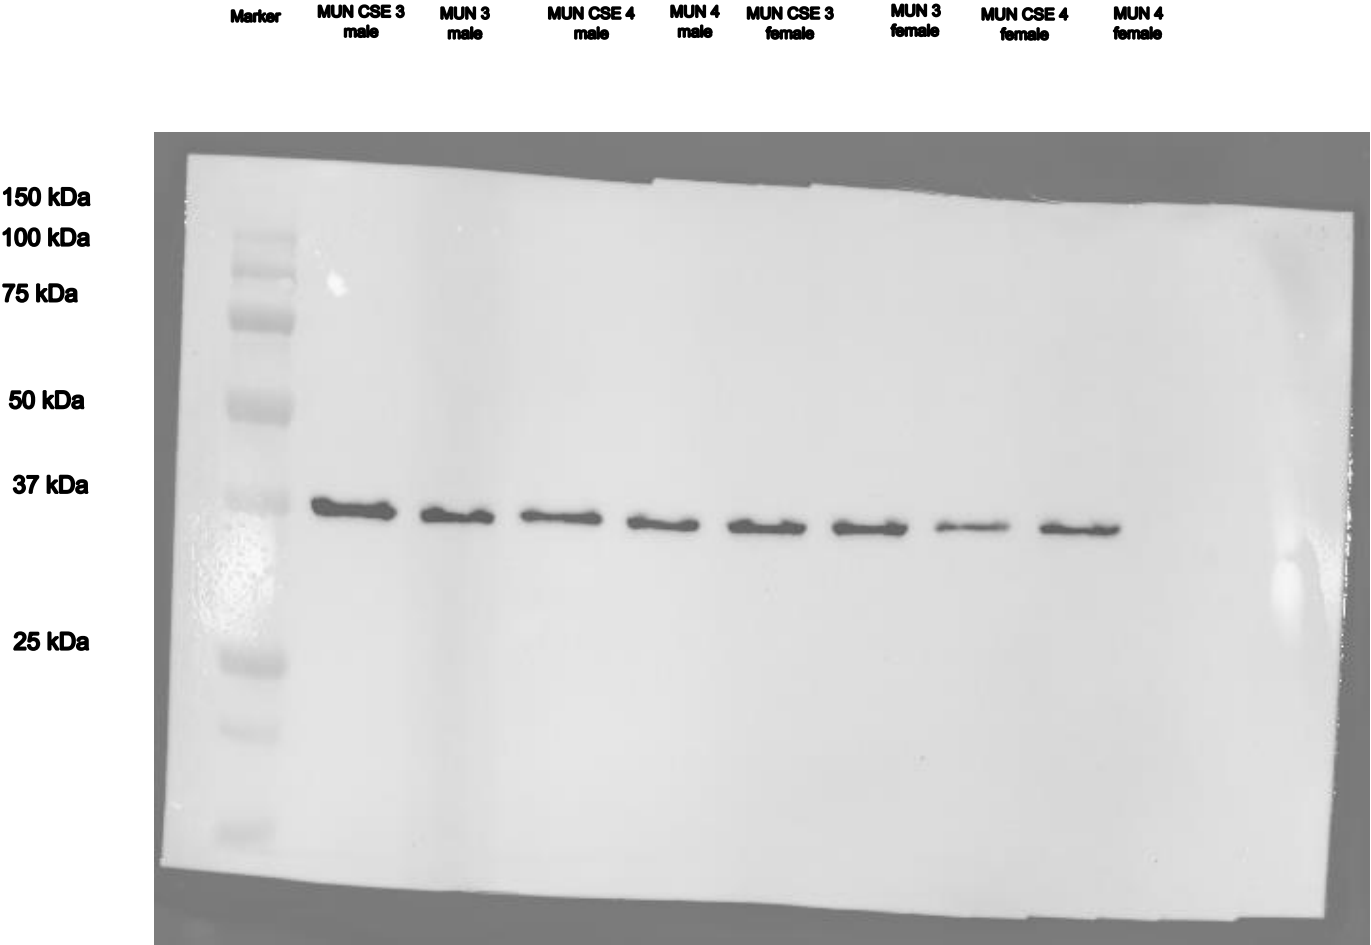

Aorta. HO-1

Gel 15

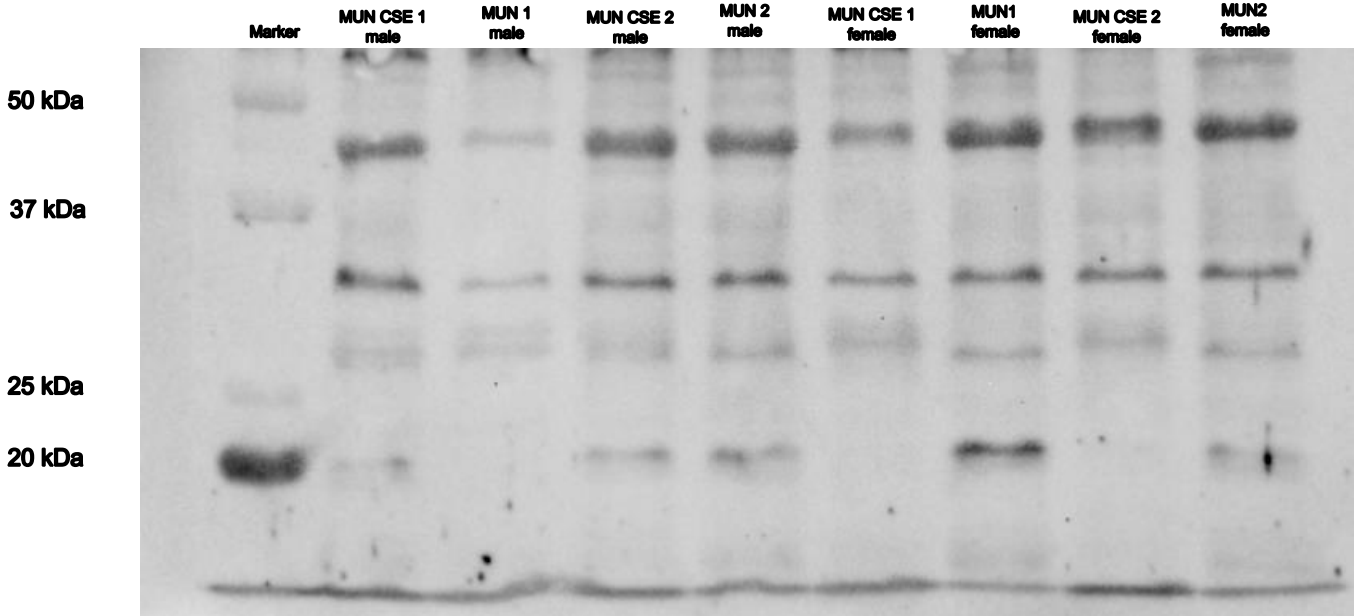

Gel 16

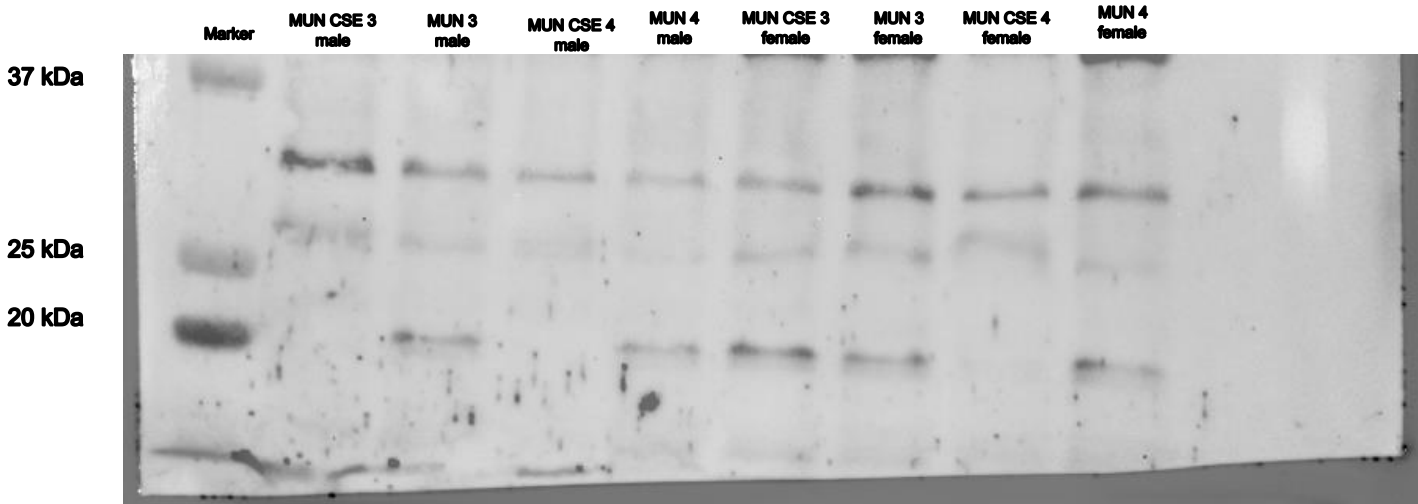

Aorta. GAPDH

Gel 15

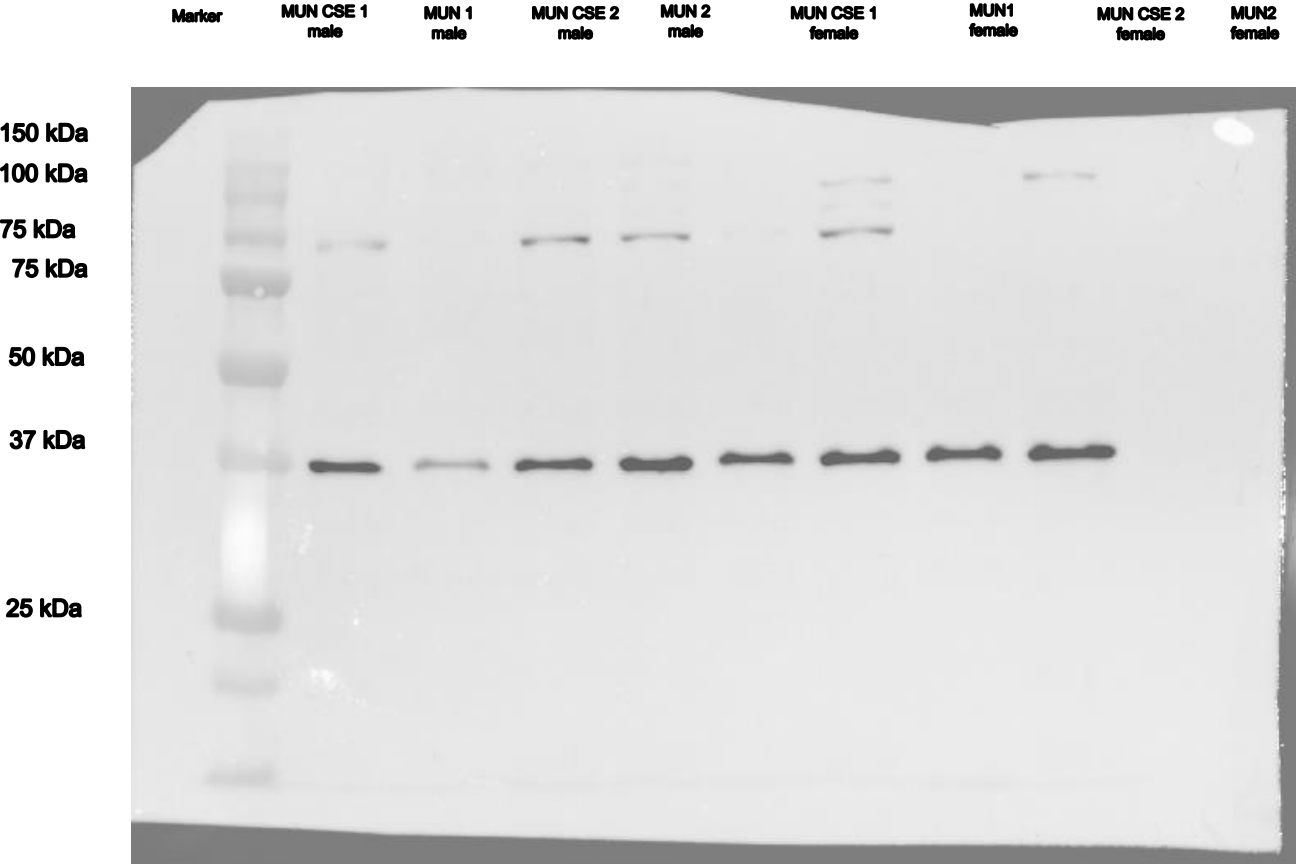

Gel 16

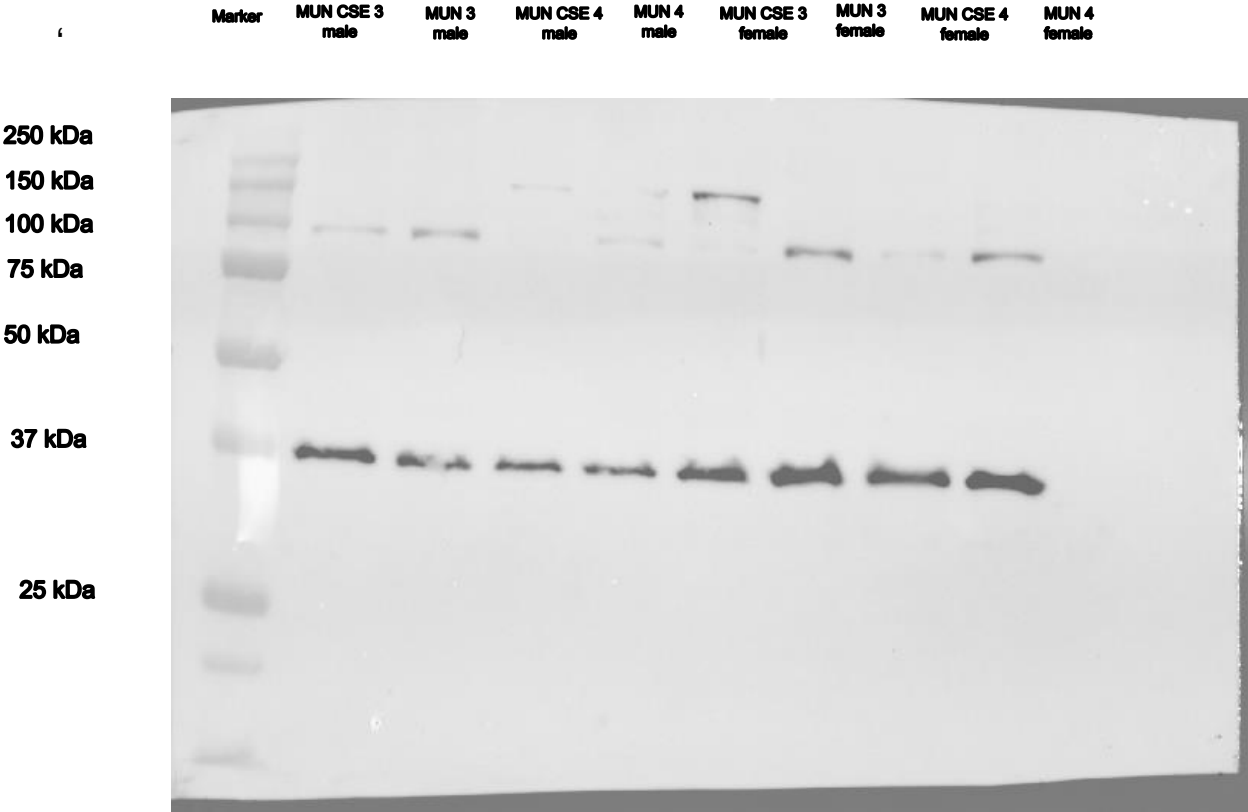

Aorta. UCP-2

Gel 17

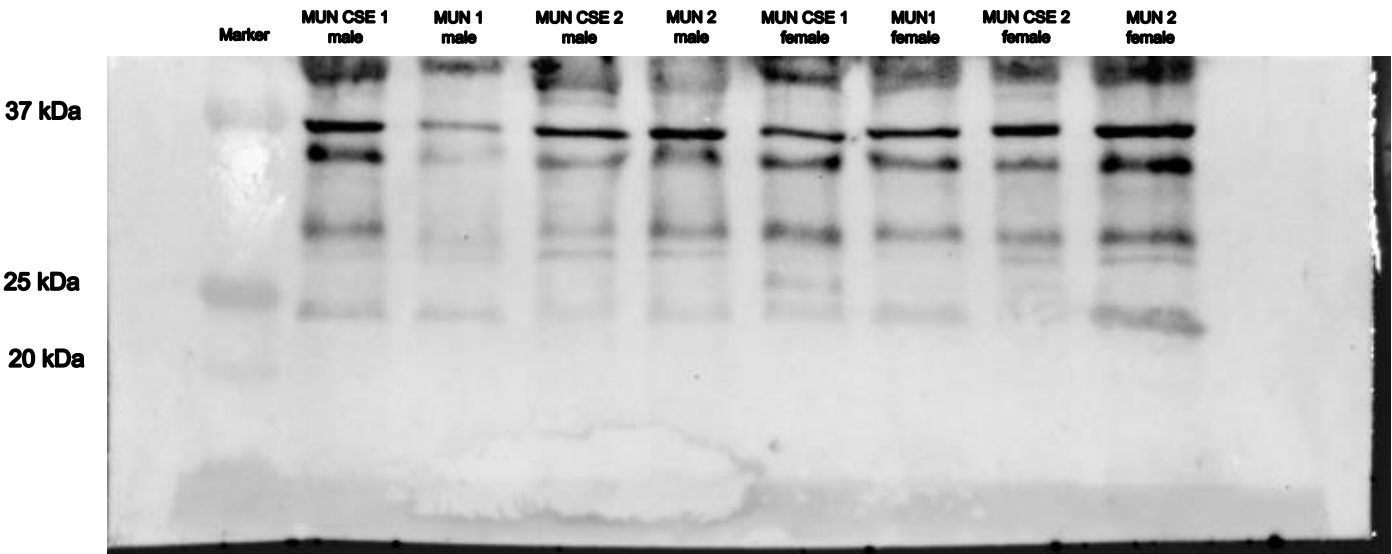



Gel 18

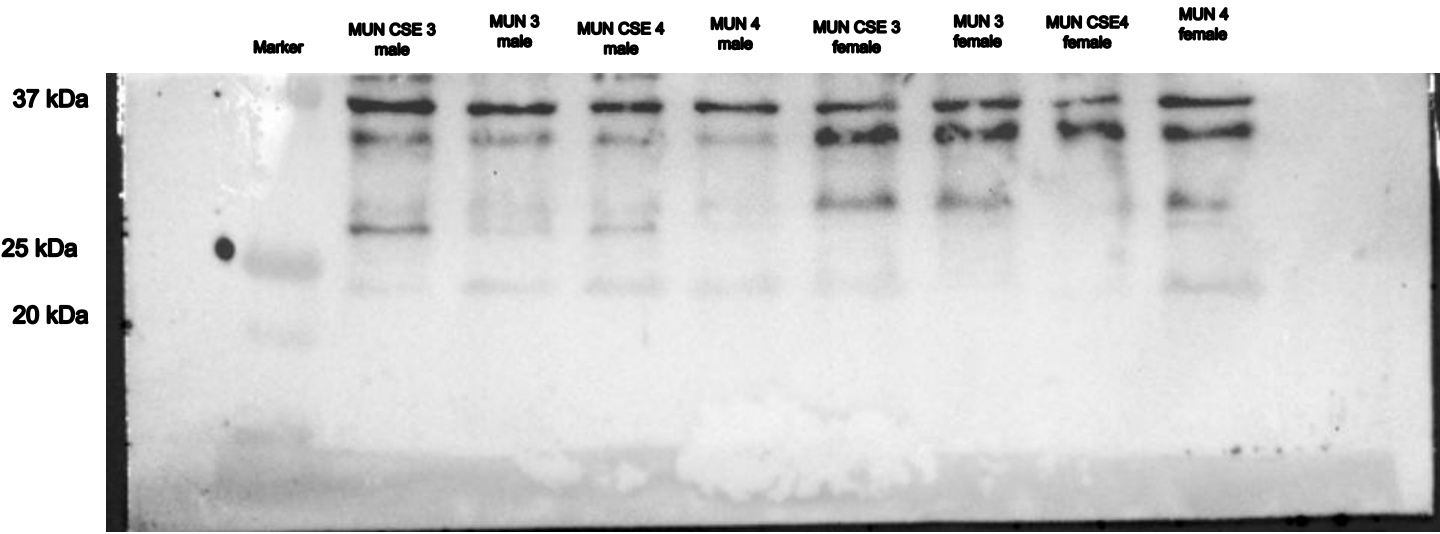

GADPH

Gel 17

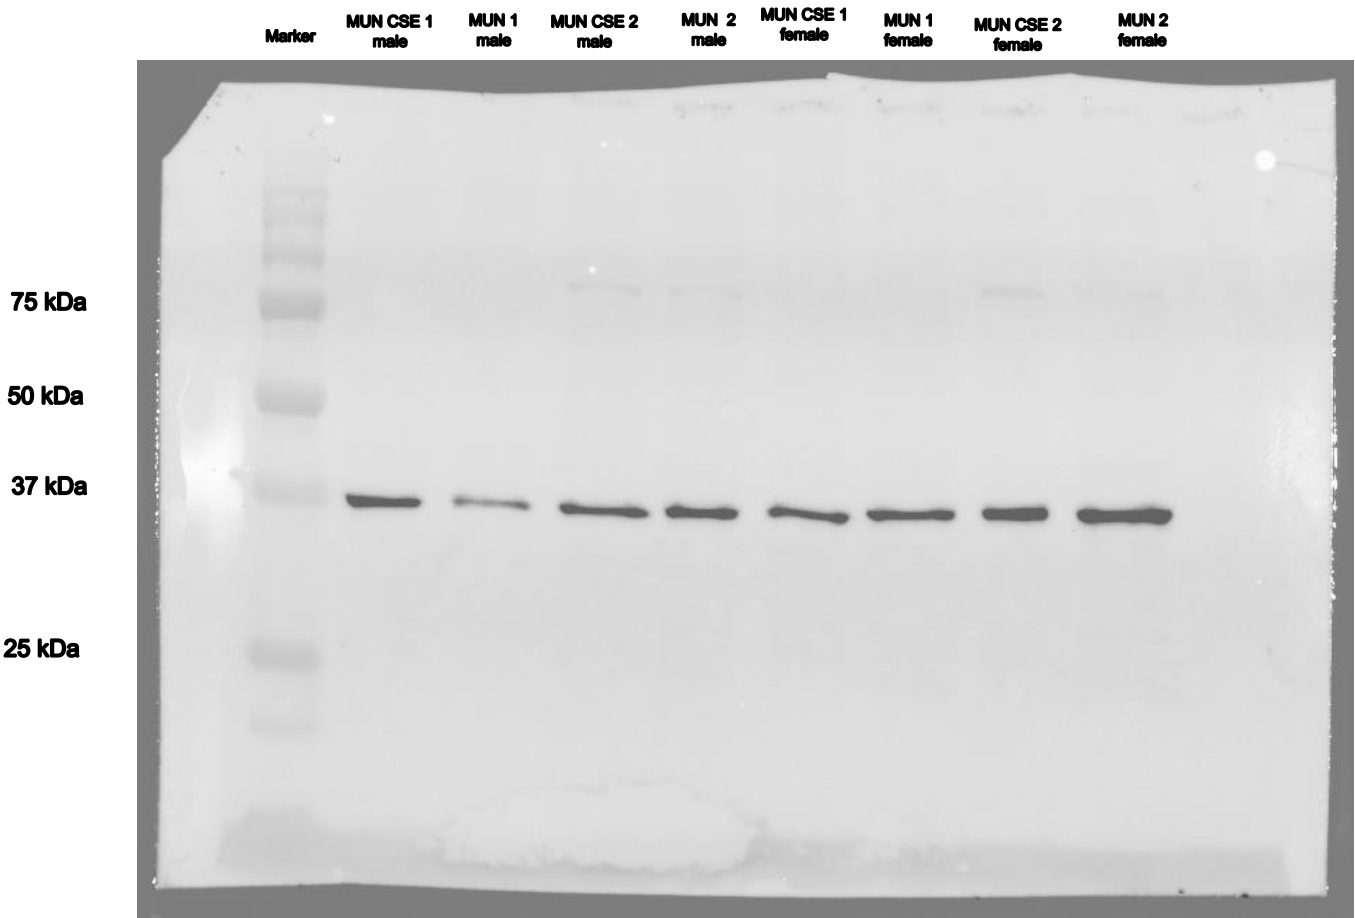

Gel 18

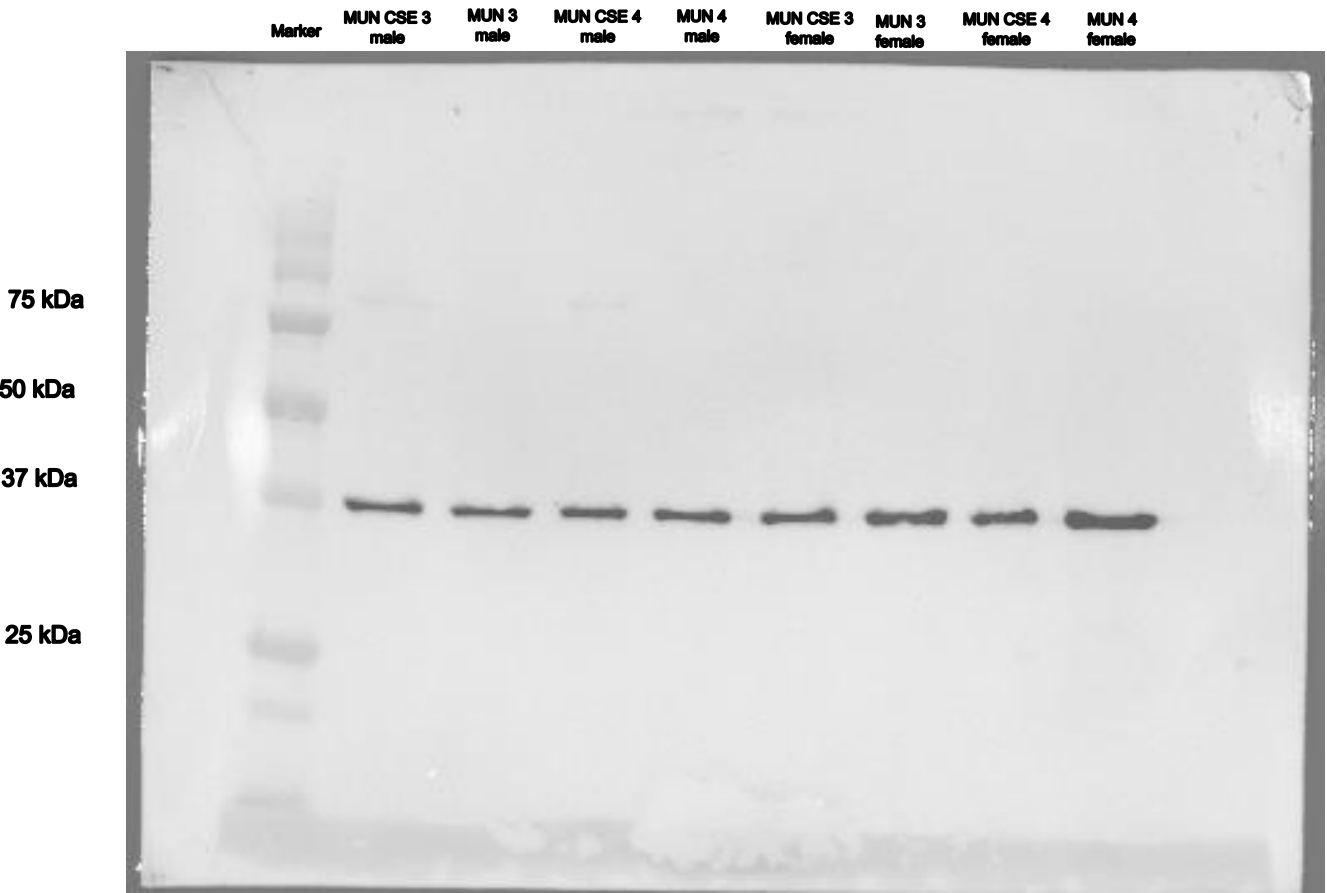

Supplement: s1 [file s1]
